## Mfge8 attenuates human gastric antrum smooth muscle contractions

Wen Li<sup>1</sup>, Ashley Olseen<sup>1</sup>, Yeming Xie<sup>1,#a</sup>, Cristina Alexandru<sup>1,#b</sup>, Brian A. Perrino<sup>1\*</sup>

<sup>1</sup>Department of Physiology and Cell Biology, University of Nevada, Reno School of Medicine, Reno NV, United States of America

<sup>#a</sup>Leonard Davis School of Gerontology, University of Southern California, Los Angeles, CA, United States of America

<sup>#b</sup>Department of Neurology & Neurosurgery, Montreal Neurological Institute & Hospital, McGill University, Montreal, QC, Canada

\*Corresponding author

E-mail: [bperrino@med.unr.edu](mailto:bperrino@med.unr.edu) (BAP)

Short title: Mfge8 and gastric antrum smooth muscle

1 Abstract

2 Coordinated gastric smooth muscle contraction is critical for proper digestion and is adversely  
3 affected by a number of gastric motility disorders. In this study we report that the secreted protein  
4 Mfge8 (milk fat globule-EGF factor 8) inhibits the contractile responses of human gastric antrum  
5 muscles to cholinergic stimuli by reducing the inhibitory phosphorylation of the MYPT1 (myosin  
6 phosphatase-targeting subunit 1) subunit of MLCP (myosin light chain phosphatase), resulting in  
7 reduced LC20 (smooth muscle myosin regulatory light chain 2) phosphorylation. We show that  
8 endogenous Mfge8 is bound to its receptor,  $\alpha 8 \beta 1$  integrin, in human gastric antrum muscles,  
9 suggesting that human gastric antrum muscle mechanical responses are regulated by Mfge8. The  
10 regulation of gastric antrum smooth muscles by Mfge8 and  $\alpha 8$  integrin functions as a brake on  
11 gastric antrum mechanical activities. Further studies of the role of Mfge8 and  $\alpha 8$  integrin in  
12 regulating gastric antrum function will likely reveal additional novel aspects of gastric smooth  
13 muscle motility mechanisms.

14

15

16

17

18

19

20

21

22

23

24

25

26

27 Introduction

28 Digestion of ingested food by the stomach involves accommodation, chemical and mechanical  
29 disruption of solids into chyme, and controlled emptying into the duodenum. To carry out these  
30 functions, the stomach is comprised of functional anatomic regions with distinct motility patterns  
31 [1, 2]. The fundus relaxes to accommodate ingested food and then tonically contracts to move  
32 the contents into the distal stomach where the solids are reduced in size by peristaltic  
33 contractions. Gastric emptying is regulated by contractions of the antrum and the resistance  
34 provided by the pyloric canal. Healthy gastric function depends on properly coordinated motor  
35 activities of the proximal and distal stomach [3]. Animal models have been studied for many years,  
36 but the regulatory mechanisms underlying the motor activities of the human stomach are not as  
37 well understood [4, 5].

38 Membrane depolarization of gastrointestinal (GI) smooth muscles triggers contraction by opening  
39 voltage-dependent (L-type)  $\text{Ca}^{2+}$  channels, non-selective cation currents, and other mechanisms  
40 that contribute to the  $\text{Ca}^{2+}$  influx and the increase in  $[\text{Ca}^{2+}]_i$  [6, 7]. The increase in  $[\text{Ca}^{2+}]_i$  activates  
41 calmodulin-dependent myosin light chain kinase (MLCK) to phosphorylate LC20 at S19 (pS19),  
42 stimulating myosin ATPase activity to generate cross-bridge cycling and contraction [8, 9].  
43 Termination of the contractile signal decreases  $[\text{Ca}^{2+}]_i$  by  $\text{Ca}^{2+}$  removal mechanisms, and  
44 inactivation of MLCK [10, 11]. LC20 is then dephosphorylated by MLCP, leading to relaxation [12,  
45 13]. MLCP activity is inhibited by upstream kinase-dependent signaling pathways [14-16].  
46 Phosphorylation of the protein kinase C- (PKC) potentiated phosphatase inhibitor protein-17 kDa  
47 (CPI-17) by PKC greatly increases its inhibition of MLCP [17, 18]. Phosphorylation of MYPT1 at  
48 T696 (human isoform numbering) inhibits MLCP activity [19, 20]. Phosphorylation of MYPT1 T853  
49 by Rho-associated coiled-coil protein kinase 2 (ROCK2) reduces the affinity of MLCP to myosin  
50 filaments in vitro [21]. However, ROCK2 phosphorylation of MYPT1 T853 does not appear to  
51 affect MLCP activity in vivo [22, 23]. In addition, expression of the MYPT1 T853A mutant does

52 not affect agonist-induced LC20 phosphorylation and force development in bladder and ileum  
53 smooth muscles [22, 24]. Thus, although it is elevated by ROCK2 activation, MYPT1 T853  
54 phosphorylation is not necessary for agonist-induced  $Ca^{2+}$  sensitization of smooth muscle [22-  
55 24]. However, ROCK2 activity in smooth muscles is clearly required for  $Ca^{2+}$  sensitization and  
56 augmented contraction [22]. Therefore, the level of MYPT1 T853 phosphorylation can be used as  
57 an indicator of myofilament  $Ca^{2+}$  sensitization in smooth muscles. Inhibiting MLCP while activating  
58 MLCK generates greater force by further increasing LC20 phosphorylation [25, 26]. This  
59 phenomenon was termed “ $Ca^{2+}$  sensitization of the contractile apparatus,” to describe the  
60 increased  $Ca^{2+}$  sensitivity of the contractile response [9].

61 A novel mechanism regulating ROCK2-dependent myofilament  $Ca^{2+}$  sensitization in gastric  
62 smooth muscles has recently been described in murine gastric antrum muscles, involving the  
63 secreted protein Mfge8 [27]. The binding of Mfge8 to  $\alpha 8\beta 1$  integrin heterodimers results in the  
64 inhibition of MYPT1 phosphorylation by ROCK2 and inhibition of antral contractility and gastric  
65 emptying [27]. In contrast, in Mfge8<sup>-/-</sup> mice, or  $\alpha 8$  integrin<sup>-/-</sup> mice, MYPT1 phosphorylation and  
66 antral contractility and gastric emptying are increased [27]. These findings indicate that Mfge8  
67 binding to  $\alpha 8\beta 1$  integrins acts as a “brake” on gastric muscle contractions, and more importantly,  
68 suggest that disrupting the binding of Mfge8 to  $\alpha 8\beta 1$  integrins in gastric smooth muscles improve  
69 or restore gastric motility in patients with gastroparesis. We have previously found that MYPT1  
70 T853 is constitutively phosphorylated in human gastric smooth muscles, and is decreased by  
71 ROCK2 inhibition [28-30]. However, whether Mfge8 regulates MYPT1 phosphorylation and the  
72 contractile responses of human gastric smooth muscles has not been reported. In this report, we  
73 show that, similar to mouse gastric antrum muscles, Mfge8 is present in human gastric antrum  
74 muscles and is constitutively bound to  $\alpha 8\beta 1$  integrin. We also show that exogenously added  
75 Mfge8 inhibits the contractions evoked by electric field stimulation of cholinergic motor neurons,

76 and the contractile responses to the cholinergic agonist carbachol (CCh), and decreases the  
77 phosphorylation of MYPT1 T696 and T853 and LC20 S19 in human gastric antrum muscles.

78

## 79 Materials and Methods

### 80 Human stomach smooth muscles

81 The use of human resected stomach tissues was approved by the Human Subjects Research  
82 Committees at the Renown Regional Medical Center and the Biomedical Institutional Review  
83 Board at the University of Nevada, Reno, and was conducted in accordance with the Declaration  
84 of Helsinki (revised version, October 2008, Seoul, South Korea). All patients provided written  
85 informed consent. Resected stomach specimens were acquired immediately after surgery from  
86 patients undergoing vertical sleeve gastrectomy. The resected stomach tissue was placed into  
87 ice-cold Krebs–Ringer buffer (KRB; composition (in mM): NaCl 118.5, KCl 4.5, MgCl<sub>2</sub> 1.2,  
88 NaHCO<sub>3</sub> 23.8, KH<sub>2</sub>PO<sub>4</sub> 1.2, dextrose 11.0, and CaCl<sub>2</sub> 2.4; for transport to the laboratory. The  
89 gastric fundus region was identified by its bulbous appearance, and the gastric antrum region was  
90 identified by its narrow tapered shape. The resected stomach tissues were opened along the  
91 staples, laid out flat, and pinned to a Sylgard-lined dish containing oxygenated KRB. The mucosa  
92 and submucosa were removed by sharp dissection. Gastric antrum muscles were mapped and  
93 obtained from regions 13–16 [31]. Rectangular strips (~4 mm × 10 mm × 2 mm) of full thickness  
94 muscle were used for the contractile studies and the protein phosphorylation studies.

95

### 96 Mechanical responses

97 Gastric antrum smooth muscle strips were attached to a Fort 10 isometric strain gauge (WPI,  
98 Sarasota, FL, USA), in parallel with the circular muscles, and pretreated with 2 μM neostigmine  
99 for 10 min at 37°C in oxygenated KRB, and three 1 min washes with KRB, to remove any residual  
100 curariform neuromuscular paralytics [32]. Contractions were measured in static myobaths with  
101 oxygenated Krebs bubbled with 97% O<sub>2</sub>-3% CO<sub>2</sub> at 37°C, the pH of KRB was 7.3–7.4). Each strip

102 was stretched to an initial resting force of ~0.8 g and then equilibrated for 45 min-60 min in 37°C  
103 oxygenated KRB. To measure the contractile responses to KCl or CCh, the muscle strips were  
104 incubated with 0.3 µM tetrodotoxin to eliminate motor neuron activity. To measure contractile  
105 responses in response to electrical field stimulation, the muscle strips were incubated with LNNA  
106 and MRS2500 to eliminate nitrenergic and purinergic motor neuron activity [30]. Contractile activity  
107 was acquired and analyzed with AcqKnowledge 3.2.7 software (BIOPAC Systems,  
108 [www.biopac.com](http://www.biopac.com)).

109

110 Automated capillary electrophoresis and immunodetection with Wes Simple Western

111 For automated capillary electrophoresis and Western blotting by Wes, the muscles were  
112 submerged into ice-cold acetone/10 µM dithiothreitol (DTT)/10% (w/v) trichloroacetic acid for  
113 2 min, snap-frozen in liquid N<sub>2</sub>, and stored at -80°C for subsequent Wes analysis [32, 33].  
114 Muscles were washed in ice-cold-acetone-10 µM DTT for 1 min, 3 times, followed by a 1 min  
115 wash in ice-cold lysis buffer (mM: 50 Tris-HCl pH 8.0, 60 β-glycerophosphate, 100 NaF, 2 EGTA,  
116 25 sodium pyrophosphate, 1 DTT, 0.5% NP-40, 0.2% sodium dodecyl sulfate and protease  
117 inhibitors [28]. Tissues were homogenized in 0.5 ml lysis buffer in a Bullet Blender (0.01%  
118 anti-foam C, one stainless steel bead per tube, speed 6, 5 min), then centrifuged at 16,000 x g,  
119 for 10 min at 4°C. Supernatants were stored at -80°C. Protein concentrations of the supernatants  
120 were determined by the Bradford assay using bovine γ-globulin as the standard. Protein  
121 expression and phosphorylation levels were measured and analyzed according to the Wes User  
122 Guide using a Wes Simple Western instrument from ProteinSimple ([www.proteinsimple.com](http://www.proteinsimple.com)).  
123 The protein samples were mixed with the fluorescent 5X master mix (ProteinSimple) and then  
124 heated at 95°C for 5 min. Boiled samples, biotinylated protein ladder, blocking buffer, primary  
125 antibodies, ProteinSimple horseradish peroxidase-conjugated anti-rabbit or anti-mouse  
126 secondary antibodies, luminol-peroxide and wash buffer were loaded into the Wes plate (Wes

127 12–230 kDa Pre-filled Plates with Split Buffer, ProteinSimple). The plates and capillary cartridges  
128 were loaded into the Wes instrument, and protein separation, antibody incubation and imaging  
129 were performed using default parameters. Compass software (ProteinSimple) was used to  
130 acquire the data, and to generate image reconstruction and chemiluminescence signal intensities.  
131 The protein and phosphorylation levels are expressed as the area of the peak chemiluminescence  
132 intensity. The following primary antibodies were used for Wes analysis: mouse anti-integrin- $\alpha$ 8,  
133 MAB6194, [www.rndsystems.com](http://www.rndsystems.com); rabbit anti-integrin- $\beta$ 1, sc-8978; rabbit anti-LC20, sc-15370;  
134 [www.scbt.com](http://www.scbt.com); rabbit anti-Mfge8, HPA002807, [www.sigmaaldrich.com](http://www.sigmaaldrich.com); rabbit anti-MYPT1  
135 (PPP1R12A), sc-25618; rabbit anti-pT696-MYPT1, sc-17556-R; rabbit anti-pT853-MYPT1,  
136 sc-17432-R; rabbit anti-pS19-LC20, PA5-17726, [www.thermofisher.com](http://www.thermofisher.com).

137

#### 138 Immunofluorescence and in situ proximity ligation assay (isPLA)

139 For both immunofluorescence and isPLA the gastric antrum smooth muscle strips were fixed with  
140 4% paraformaldehyde in PBS, and then cryo-protected with PBS/30% sucrose at 4°C, embedded  
141 in OCT, and frozen at -80°C [34]. The blocks were cut using a microtome into 10  $\mu$ m sections  
142 and placed onto Vectabond (SP-1800) coated glass slides (Fisherbrand Superfrost Plus  
143 Microscope Slides, 12-550-15). After 20 min microwave heat-induced antigen retrieval in Tris-  
144 EDTA buffer (10 mM Tris base, 1 mM EDTA solution, 0.05% Tween 20, pH 9.0), the slides were  
145 permeabilized and blocked with PBS containing 0.2% Tween-20 and 1% BSA for 10 min at room  
146 temperature. The slides were then incubated overnight at 4°C with the appropriate primary  
147 antibody as indicated below. Immunofluorescent labeling was performed with the appropriate  
148 Alexa-488 or Alexa-594 conjugated secondary antibody (Cell Signaling Technology,  
149 [www.cellsignal.com](http://www.cellsignal.com)) against the primary antibody (1:500 for 30 min at room temperature in PBS).  
150 isPLA was performed according to the manufacturer's instructions using the Duolink In Situ  
151 Detection Reagents Red DUO92008 (Sigma-Aldrich, Olink Bioscience, Sweden,  
152 [www.sigmaaldrich.com](http://www.sigmaaldrich.com)) [34]. The muscle sections were incubated with each primary antibody

153 (1:400 dilution) sequentially for 1 h at room temperature. The slides were then incubated with the  
154 appropriate PLA probes (diluted 1:5 in PBS containing 0.05% Tween-20 and 3% bovine serum  
155 albumin) in a pre-heated humidified chamber at 37°C for 1 h, followed by the ligation (30 min,  
156 37°C) and amplification (100 min, 37°C) reactions. Mounting medium with DAPI was used to label  
157 nuclei blue. It has been reported that the number of PLA signals can decrease as kits get older  
158 [35]. We did not experience any differences in the PLA results as the kits aged. However, control  
159 and treated muscle sections were compared using Duolink Detection kits from the same lot  
160 number prior to the lot expiration date. The following antibodies were used for isPLA: mouse anti-  
161 integrin- $\alpha$ 8, MAB6194, [www.rndsystems.com](http://www.rndsystems.com); rabbit anti-integrin- $\beta$ 1, sc-8978, [www.scbt.com](http://www.scbt.com);  
162 rabbit anti-Mfge8, HPA002807, [www.sigmaaldrich.com](http://www.sigmaaldrich.com); rabbit anti-enteric  $\gamma$ -actin, GTX55849,  
163 [www.genetex.com](http://www.genetex.com).

164

#### 165 Confocal microscopy and image acquisition

166 The slides were examined using an LSM510 Meta (Zeiss, [www.zeiss.com](http://www.zeiss.com)) or Fluoview FV1000  
167 confocal microscope (Olympus, [www.olympus-lifescience.com](http://www.olympus-lifescience.com)) [34]. Confocal micrographs are  
168 digital composites of the Z-series of scans (1  $\mu$ m optical sections of 10  $\mu$ m thick sections). Settings  
169 were fixed at the beginning of both acquisition and analysis steps and were unchanged.  
170 Brightness and contrast were slightly adjusted after merging. Final images were constructed using  
171 FV10-ASW 2.1 software (Olympus). Each image is representative of labeling experiments from 3  
172 sections from 3 gastric antrum muscles. Scale bars, 10  $\mu$ m.

173

#### 174 Data and Statistical analysis

175 Contractile responses were compared by measuring the area under the curve (AUC) of each peak  
176 including the contribution of basal tone (integral, grams  $\times$  seconds) divided by time (seconds), per  
177 cross-sectional area ( $\text{cm}^2$ ) of the smooth muscles, using Acknowledge. The average peak  
178 responses (mean (SD)) were calculated using Prism, and significance was determined by *t* test



179 using Prism with  $P < 0.05$  considered as significant. Graphs were generated using Prism. The  
180 area of the peak chemiluminescence intensity values of the protein bands were calculated by  
181 Compass software. The chemiluminescence intensity values of pT696, pT853, and pS19 were  
182 divided by the total MYPT1, and LC20 chemiluminescence intensity values from the same  
183 sample, respectively, to obtain the ratio of phosphorylated protein to total protein. The ratios were  
184 normalized to 1 for unstimulated muscles and all ratios were subsequently analyzed by  
185 non-parametric repeated tests of ANOVA using Prism 7.01 software (GraphPad  
186 Software, [www.graphpad.com](http://www.graphpad.com)), and are expressed as the means  $\pm$  SD. Student's t test was used  
187 to measure significance and  $P < 0.05$  is considered significant. The digital lane views (bitmaps) of  
188 the immunodetected protein bands were generated by Compass software, with each lane  
189 corresponding to an individual capillary tube. The isPLA figures were created from the digitized  
190 data using Adobe Photoshop Version 12.0.3. Graphs were generated using GraphPad/Prism.

191

## 192 Drugs and reagents

193 Recombinant human Mfge8 and recombinant human laminin subunit alpha-1 were purchased  
194 from R&D Systems, [www.rndsystems.com](http://www.rndsystems.com); atropine and tetrodotoxin were obtained from EMD  
195 Millipore, [www.emdmillipore.com](http://www.emdmillipore.com); and MRS2500 was purchased from Tocris Bioscience,  
196 [www.tocris.com](http://www.tocris.com). All other reagents and chemicals purchased were of analytical grade or better.

197

## 198 Results

199 Human gastric antrum muscles express Mfge8,  $\alpha 8$  integrin, and  $\beta 1$  integrin.

200 Since Mfge8 and  $\alpha 8$  integrin expression in human gastric antrum muscles has not been reported,  
201 we examined homogenates of human gastric antrum muscles for Mfge8 and  $\alpha 8$  integrin protein  
202 expression, along with  $\beta 1$  integrin protein expression. Similar to murine gastric antrum muscles,  
203 human gastric antrum muscles express Mfge8 (43kDa),  $\alpha 8$  integrin (118kDa), and  $\beta 1$  integrin  
204 (89kDa), as shown by the Wes analysis of human gastric antrum muscle lysates in Figure 1.

205

206 **Figure 1. Mfge8,  $\alpha 8$  integrin, and  $\beta 1$  integrin are expressed in human gastric antrum**  
207 **smooth muscles.** Representative Wes image of Mfge8,  $\alpha 8$  integrin, and  $\beta 1$  integrin proteins in  
208 gastric antrum smooth muscle by chemiluminescence immunodetection using anti- Mfge8 (100X  
209 dilution),  $\alpha 8$  integrin (100X dilution), and  $\beta 1$  integrin (100X dilution) antibodies in duplicate as  
210 described in the Methods. 5.0 $\mu$ g lysate protein per lane. Anti-LC20 (1:500 dilution)  
211 immunodetection was used as the loading control.

212

213 Human gastric antrum muscles contain  $\alpha 8\beta 1$  integrin heterodimers.

214 Because it was previously reported by Khalifeh-Soltani *et al.*, 2016b that Mfge8 binds to  $\alpha 8$   
215 integrin in  $\alpha 8\beta 1$  integrin heterodimers in murine gastric antrum muscles, we used in situ PLA to  
216 determine whether Mfge8 binds to  $\alpha 8$  integrin in  $\alpha 8\beta 1$  integrin heterodimers in human gastric  
217 antrum muscles. We also immunostained entericactin to localize smooth muscles cells in the  
218 antrum smooth muscle sections. The isPLA results and enteric  $\gamma$ -actin immunostaining in Figure  
219 2A show that  $\alpha 8\beta 1$  integrin heterodimers are present in human gastric antrum smooth muscles.  
220 We then carried out in situ PLA using anti  $\alpha 8$  integrin and anti Mfge8 antibodies to determine  
221 whether human gastric antrum smooth muscles contain Mfge8 bound to  $\alpha 8$  integrin. We also  
222 immunostained  $\beta 1$  integrin to localize smooth muscle cell plasma membranes in the antrum  
223 smooth muscle sections. The isPLA results and  $\beta 1$  integrin immunostaining in Figure 2B show  
224 that Mfge8 is likely bound to  $\alpha 8$  integrin in human gastric antrum smooth muscles.

225

226 **Figure 2.  $\alpha 8\beta 1$  integrin heterodimers and Mfge8 interactions with  $\alpha 8$  integrin in human**  
227 **gastric antrum smooth muscle shown by in situ PLA.** Representative confocal microscopy  
228 images from gastric antrum smooth muscle sections. A. Section immunostained with enteric  $\gamma$ -  
229 actin (green), and then probed with anti-  $\alpha 8$  integrin and  $\beta 1$  integrin antibodies for PLA

230 immunostaining (red spots). B. Section immunostained with  $\beta$ 1 integrin (green), and then probed  
231 with anti- Mfge8 and  $\alpha$ 8 integrin antibodies for PLA immunostaining (red spots).

232

233 Exogenously added Mfge8 inhibits CCh-evoked contractions of human gastric antrum muscles.  
234 We next determined if Mfge8 can regulate human gastric antrum muscle contractile responses.  
235 Figure 3 shows the isometric contractile responses of human gastric antrum muscle strips to the  
236 cholinergic agonist CCh. CCh at concentrations of 1  $\mu$ M and 5  $\mu$ M dose-dependently increased the  
237 force of contractions, as shown in the contractile recordings and the summarized data. After  
238 washout of CCh, Mfge8 was added to the myobaths at a concentration of 100  $\mu$ g/ml, and incubated  
239 with the muscle strips for 90 minutes. Laminin was added to separate myobaths at a  
240 concentration of 100  $\mu$ g/ml, as a negative control integrin RGD-binding protein [36]. As shown in  
241 Figs. 3B and 3C, the addition of Mfge8 cause a rapid, but transient contraction of the muscle  
242 strips, while laminin had no effect upon addition to the myovbath. As shown in Figs. 3A and 3D,  
243 the contractile responses to 5  $\mu$ M CCh 90 minutes after the first 5  $\mu$ M CCh-evoked contraction  
244 were unchanged. Similarly, after incubation with laminin for 90 minutes, Figs. 3B and 3E show  
245 that the contractile responses of human gastric antrum muscle strips to 5  $\mu$ M CCh were similar to  
246 the first 5  $\mu$ M CCh-evoked contraction. In contrast, Figs. 3C and 3F show that compared to the  
247 first 5  $\mu$ M CCh-evoked contraction, the contractile response of human gastric antrum muscle strips  
248 to 5  $\mu$ M CCh was significantly decreased by incubation with Mfge8 for 90 minutes. In addition,  
249 Figs. 3C and 3F show that the contractile responses of the muscle strips to 5  $\mu$ M CCh recovered  
250 following washout of Mfge8, as indicated by the increase in the AUC.

251

252 **Figure 3. Exogenously added Mfge8 inhibits CCh-evoked contractions of human gastric**  
253 **antrum smooth muscle.** Representative tension recordings of the contractile responses to 5  $\mu$ M  
254 CCh alone (A), or in the presence of 100  $\mu$ g/ml laminin (B), or 100  $\mu$ g/ml Mfge8 (C). Summarized

255 data of the areas under the curve of each contractile response (D,E,F). (n= 6; 2 muscle strips  
256 from 3 gastric antrums; \*P<0.05).

257

258 Exogenously added Mfge8 inhibits MYPT1 and LC20 phosphorylation in human gastric antrum  
259 muscles.

260 It was previously determined that Mfge8 inhibits murine gastric antrum muscle contractions by  
261 inhibiting MYPT1 pT696 phosphorylation, resulting in decreased LC20 phosphorylation [27].

262 Since we found that Mfge8 inhibits human gastric antrum muscle contractions, we examined  
263 whether CCh-evoked MYPT1 and LC20 phosphorylation are inhibited by Mfge8. As shown in

264 Figs. 4A and 4B, 5 min treatment with 5 $\mu$ M CCh increased MYPT1 T696 and T853  
265 phosphorylation. Incubation with laminin for 90 minutes had no effect on the CCh-evoked increase

266 in MYPT1 T853 phosphorylation and did not affect T696 phosphorylation. However, Figs. 4A and  
267 4B show that the CCh-evoked increase in MYPT1 T853 phosphorylation was significantly

268 inhibited by incubation with Mfge8 for 90 minutes, and MYPT1 pT696 phosphorylation was  
269 reduced. Figures 4C and 4D show that LC20 S19 phosphorylation was consistently increased by

270 CCh treatment, but this increase was not statistically significant. Laminin had no effect on the  
271 increase in LC20 S19 phosphorylation (Figs. 4C, 4D). In contrast, the CCh-evoked increase in

272 LC20 S19 phosphorylation was inhibited by incubation with Mfge8 for 90 minutes, but this  
273 decrease was not statistically significant.

274

275 **Figure 4. Exogenously added Mfge8 inhibits CCh-evoked phosphorylation of MYPT1 and**

276 **LC20 in human gastric antrum smooth muscles.** A. Representative Wes analysis of MYPT1

277 T853 and T696 phosphorylation by 5 $\mu$ M CCh alone, or in the presence of 100 $\mu$ g/ml laminin, or

278 100 $\mu$ g/ml Mfge8. B. Summary of the effects of 5 $\mu$ M CCh alone, or in the presence of 100 $\mu$ g/ml

279 laminin, or 100 $\mu$ g/ml Mfge8 on MYPT1 T853 and T696 phosphorylation. C. Representative Wes

280 analysis of LC20 S19 phosphorylation by 5 $\mu$ M CCh alone, or in the presence of 100 $\mu$ g/ml laminin,

281 or 100µg/ml Mfge8. D. Summary of the effects of 5µM CCh alone, or in the presence of 100µg/ml  
282 laminin, or 100µg/ml Mfge8 on LC20 S19 phosphorylation. GAPDH immunodetection was used  
283 as the loading control. (n= 6; 2 muscle strips from 3 gastric antrums).

284

285 Exogenously added Mfge8 inhibits contractions of human gastric antrum muscles evoked by  
286 electrical field stimulation (EFS).

287 Having found that Mfge8 reduces MYPT1 and LC20 phosphorylation and inhibits CCh-evoked  
288 contractions, we then determined if Mfge8 inhibits the contractile responses to endogenous  
289 cholinergic motor neurotransmission. The isometric contractile responses of human gastric  
290 antrum smooth muscles to 5Hz, 10Hz, and 20Hz EFS were obtained in the presence of LNNA  
291 and MRS2500 to block nitrenergic and purinergic neurotransmission. Figure 5A shows that  
292 contractile responses were increased in a frequency dependent manner, and were completely  
293 blocked by atropine. As shown in Fig. 5B, the contractile responses to 5Hz, 10Hz, and 20Hz EFS  
294 90 minutes after the first set of EFS-evoked contractions were unchanged. Mfge8 was added to  
295 the myobaths at a concentration of 100µg/ml, and incubated with the muscle strips for 90 minutes.  
296 Figure 5C shows that compared to the first set of EFS-evoked contractions, the EFS-evoked  
297 contractile responses to 5Hz, 10Hz, and 20Hz EFS were significantly inhibited by incubation with  
298 100µg/ml Mfge8 for 90 minutes.

299

300 **Figure 5. Exogenously added Mfge8 inhibits EFS-evoked cholinergic contractions of**  
301 **human gastric antrum smooth muscle.** A. Representative tension recording of the contractile  
302 responses to 5Hz, 10Hz, 20Hz alone, or in the presence of 1µM atropine. B. Representative  
303 tension recording of the contractile responses to 5Hz, 10Hz, 20Hz alone. C. Representative  
304 tension recording of the contractile responses to 5Hz, 10Hz, 20Hz alone, or in the presence of  
305 100µg/ml Mfge8. (n= 3; 1 muscle strip from 3 gastric antrums).

306

307 Discussion

308 It was previously reported by Khalifeh-Solani et al. that in mice, Mfge8 inhibits antral muscle  
309 contractions and slows gastrointestinal motility by specifically binding to  $\alpha\beta$  integrin in  $\alpha8\beta1$   
310 integrin heterodimers, resulting in reduced phosphorylation of the inhibitory MYPT1 subunit of  
311 MLCP, and consequentially reduced LC20 phosphorylation [27]. In addition, either smooth  
312 muscle-specific deletion of Mfge8 or  $\alpha8$  resulted in an increase in gastric antral contractile force,  
313 more rapid gastric emptying, and faster small intestinal transit times [27]. These findings revealed  
314 a novel inhibitory mechanism regulating gastric antrum function, raising the question as to  
315 whether a similar mechanism is involved in regulating human gastric antrum smooth muscle  
316 contractile responses. The expression of Mfge8 or  $\alpha8$  integrin in human gastric antrum muscles  
317 has not been described previously, thus in this study we determined that both Mfge8 and  $\alpha8\beta1$   
318 integrin heterodimers are present in human gastric antrum muscles, and that Mfge8 is bound to  
319  $\alpha8\beta1$  integrin heterodimers. We also show that exogenously added Mfge8 inhibits the contractile  
320 responses of human gastric antrum muscles to exogenous and endogenous cholinergic stimuli.  
321 This inhibition of contraction was accompanied by inhibition of MYPT1 and LC20 phosphorylation,  
322 supporting a novel role for  $\alpha8\beta1$  integrins and Mfge8 in regulating human gastric motility by  
323 attenuating MYPT1 phosphorylation. The findings that both Mfge8 and  $\alpha8\beta1$  integrin  
324 heterodimers are present in human gastric antrum muscles, suggest that Mfge8 is involved in the  
325 regulation of human gastric antrum muscle mechanical responses. We used in situ PLA to  
326 demonstrate the interaction between Mfge8 and  $\alpha8$  integrin. We were not able to examine the  
327 effects of abrogating the binding of Mfge8 to  $\alpha8\beta1$  integrins because there is no inhibitor of Mfge8  
328 binding to  $\alpha8\beta1$  integrins available. However, adding Mfge8 protein to the muscle strips in the  
329 myobaths significantly inhibited the contractile responses to the cholinergic agonist CCh or to  
330 EFS-evoked cholinergic neurotransmission. These findings suggest that there are  $\alpha8\beta1$  integrins  
331 not occupied by Mfge8, and that increases in Mfge8 could further inhibit gastric antrum muscle  
332 contraction.

333 Mfge8 (originally named lactadherin) was first identified in breast milk, having antimicrobial and  
334 antiviral effects, and playing an important role in immune defense as a secreted immune system  
335 molecule [37, 38]. Mfge8 is now known to be a ubiquitously expressed multifunctional protein  
336 belonging to the family of secreted integrin-binding glycoproteins containing the RGD integrin-  
337 binding motif [39]. The most well known role for  $\alpha 8\beta 1$  is in kidney morphogenesis where deletion  
338 of  $\alpha 8$  integrin leads to impaired recruitment of mesenchymal cells into epithelial structures[40, 41].  
339  $\alpha 8$  integrin is a member of the RGD-binding integrin family that is prominently expressed in  
340 smooth muscle coupled to  $\beta 1$  integrin [42-44]. Previous work has shown the expression of  $\alpha 8$   
341 integrin in both vascular and visceral smooth muscle, as well as the muscularis mucosa of the GI  
342 tract [42]. In vitro studies suggest that  $\alpha 8$  promotes smooth muscle differentiation, and maintains  
343 vascular smooth muscle in a differentiated, contractile, non-migratory phenotype [43, 45]. Mfge8  
344 and  $\alpha 8$  integrin also modulate smooth muscle contractile force. In Mfge8<sup>-/-</sup> mice, or  $\alpha 8$  integrin<sup>-/-</sup>  
345 mice, airway and jejunal smooth muscle contraction are enhanced in response to contractile  
346 agonists after these muscle beds have been exposed to inflammatory cytokines but not under  
347 basal conditions [27, 46, 47]. Whether the origin of Mfge8 in gastric muscles is from circulating  
348 Mfge8 or locally secreted is unclear. Mfge8 can reach the gastric antrum smooth muscle layer  
349 by oral gavage, but it is not clear how Mfge8 reaches the gastric antrum smooth muscle layer, or  
350 how widespread the distribution of Mfge8 is after oral administration [27]. Determining the source  
351 of Mfge8 present in gastric muscle tissues is an important issue to address in future studies of  
352 gastric motility regulatory mechanisms.

353 In summary, in this study we report that the secreted protein Mfge8 inhibits the contractile  
354 responses of human gastric antrum muscles to cholinergic stimuli by reducing the inhibitory  
355 phosphorylation of the MYPT1 subunit of MLCP, resulting in reduced LC20 phosphorylation. We  
356 found that endogenous Mfge8 is bound to its receptor,  $\alpha 8\beta 1$  integrin, in human gastric antrum  
357 muscles, suggesting that human gastric antrum muscle mechanical responses are regulated by

358 Mfge8. These findings, and the findings of Khalifeh-Soltani et al. 2016, reveal an additional  
359 pathway regulating the contractile responses of smooth muscles. Elevations in cytosolic Ca<sup>2+</sup>  
360 directly promote smooth muscle contraction by Ca<sup>2+</sup>/calmodulin activation of MLCK and  
361 phosphorylation of LC20 [9]. Rho kinase and PKC activities contribute to MLCK activity by  
362 phosphorylating the regulatory subunits of MLCP to promote LC20 phosphorylation and increase  
363 the myofilament sensitivity to Ca<sup>2+</sup> [48]. In addition, a number of studies have provided evidence  
364 that dynamic changes to the actin cytoskeleton play an important role in smooth muscle  
365 contraction [49, 50]. This remodeling process is thought to facilitate the polymerization of cortical  
366 cytoskeletal actin filaments and increase the stability of focal adhesions in the membrane,  
367 allowing for the force generated by myofilament activation to be transmitted to the connective  
368 tissue of the extracellular matrix [51, 52]. Tyrosine phosphorylation of protein tyrosine kinase 2 β  
369 (Pyk2) and focal adhesion kinase (FAK), along with the recruitment of other integrin-associated  
370 proteins to focal adhesions, occurs during contraction and force development [53]. In addition, we  
371 found that FAK also promotes gastric smooth muscle contraction by activation of the PKC-CPI-  
372 17 Ca<sup>2+</sup> sensitization pathway [33]. The regulation of gastric antrum smooth muscles by Mfge8  
373 and α8 integrin opposes the prokinetic actions of MLCK activation, MLCP inhibition, and  
374 cytoskeletal remodeling. In this regard, Mfge8 α8 integrin signaling seems to function as a brake  
375 on gastric antrum mechanical activities. Further studies of the role of Mfge8 and α8 integrin in  
376 regulating gastric antrum function will likely reveal additional novel aspects of gastric smooth  
377 muscle motility mechanisms.

378

### 379 Acknowledgements

380 The research reported in this publication was supported by a National Institute of Diabetes and  
381 Digestive and Kidney Diseases Diabetic Complications Consortium (DiaComp,  
382 <http://www.diacomp.org>) Grant DK076169, and a Takeda Pharmaceuticals Innovation Center



383 Grant to BAP, and by a Mick Hitchcock Graduate Student Scholarship to YX. We thank Drew  
384 Syder and Jill Wykosky of the Takeda GI Drug Discovery Unit for their enthusiastic guidance and  
385 expert advice during the course of this study.

## 386 References

- 387 1. Janssen P, Vanden Berghe P, Verschueren S, Lehmann A, Depoortere I, Tack J. Review  
388 article: the role of gastric motility in the control of food intake. *Aliment Pharmacol Ther*  
389 2011;33(8):880-894. pmid: 21342212.  
390
- 391 2. Kong F, Singh RP. Disintegration of solid foods in human stomach. *J Food Sci*.  
392 2008;73(5):R67-R80. pmid: 18577009.  
393
- 394 3. Tack J, Janssen P. Gastroduodenal motility. *Curr Opin Gastroenterol*. 2010;26:647-655.  
395 pmid: 20838344.  
396
- 397 4. Goyal RK, Guo Y, Mashimo H. Advances in the physiology of gastric emptying.  
398 *Neurogastroenterol Motil*. 2019;31(4):e13546. pmid: 30740834.  
399
- 400 5. Tack J, Masuy I, Van Den Houte K, Wauters L, Schol J, Vanuytsel T, et al. Drugs under  
401 development for the treatment of functional dyspepsia and related disorders. *Expert Opin*  
402 *Investig Drugs*. 2019;28(10):871-889. pmid: 31566013.  
403
- 404 6. Sanders KM, Koh SD, Ro S, Ward SM. Regulation of gastrointestinal motility--insights from  
405 smooth muscle biology. *Nat Rev Gastroenterol Hepatol*. 2012;9(11):633-645. pmid:  
406 22965426.  
407
- 408 7. Zhang RX, Wang XY, Chen D, Huizinga JD. Role of interstitial cells of Cajal in the  
409 generation and modulation of motor activity induced by cholinergic neurotransmission in  
410 the stomach. *Neurogastroenterol Motil*. 2011;23(9):e356-e371. pmid: 21781228.  
411
- 412 8. He WQ, Peng YJ, Zhang WC, Lv N, Tang J, Chen C, et al. Myosin light chain kinase is  
413 central to smooth muscle contraction and required for gastrointestinal motility in mice.  
414 *Gastroenterol*. 2008;135(2):610-620. pmid: 18586037.  
415
- 416 9. Somlyo AP, Somlyo AV. Ca<sup>2+</sup> sensitivity of smooth muscle and nonmuscle myosin II:  
417 Modulated by G proteins, kinases, and myosin phosphatase. *Physiol Rev*. 2003;83(4):1325-  
418 1358. pmid: 14506307.  
419
- 420 10. Somlyo AP, Himpens B. Cell calcium and its regulation in smooth muscle. *FASEB J*.  
421 1989;3:2266-2276. pmid: 2506092.  
422
- 423 11. Somlyo AP, Somlyo AV. Electron probe analysis of calcium content and movements in  
424 sarcoplasmic reticulum, endoplasmic reticulum, mitochondria, and cytoplasm. *J Cardiovasc*  
425 *Pharmacol*. 1986;8 Suppl 8:S42-S47. pmid: 2433524.  
426  
427

- 428 **12.** Alessi D, MacDougall LK, Sola MM, Ikebe M, Cohen P. The control of protein  
429 phosphatase-1 by targeting subunits. The major myosin phosphatase in avian smooth  
430 muscle is a novel form of protein phosphatase-1. *Eur J Biochem.* 1992;210:1023-1035.  
431 pmid: 1336455  
432
- 433 **13.** Paul RJ, Shull GE, Kranias EG. The sarcoplasmic reticulum and smooth muscle function:  
434 evidence from transgenic mice. *Novartis Found Symp.* 2002;246:228-238.  
435 pmid: 12164311  
436
- 437 **14.** Feng J, Ito M, Ichikawa K, Isaka N, Nishikawa M, Hartshorne DJ, et al. Inhibitory  
438 phosphorylation site for Rho-associated kinase on smooth muscle myosin phosphatase. *J*  
439 *Biol Chem.* 1999;274(52):37385-37390. pmid: 10601309.  
440
- 441 **15.** Ito M, Nakano T, Erdodi F, Hartshorne D. Myosin phosphatase: Structure, regulation and  
442 function. *Mol Cell Biochem.* 2004;259:197-209. pmid:15124925.  
443
- 444 **16.** Kitazawa T, Eto M, Woodsome TP, Khalequzzaman M. Phosphorylation of the myosin  
445 phosphatase targeting subunit and CPI-17 during Ca<sup>2+</sup> sensitization in rabbit smooth  
446 muscle. *J Physiol.* 2003;546(3):879-889. pmid: 2342583.  
447
- 448 **17.** Eto M, Ohmori T, Suzuki M, Furuya K, Morita F. A novel protein phosphatase-1 inhibitory  
449 protein potentiated by protein kinase C. Isolation from porcine aorta media and  
450 characterization. *J Biochem.* 1995;118(6):1104-1107. pmid:8720121.  
451
- 452 **18.** Hayashi Y, Senba S, Yazawa M, Brautigan DL, Eto M. Defining the structural determinants  
453 and a potential mechanism for inhibition of myosin phosphatase by the protein kinase C-  
454 potentiated inhibitor protein of 17 kDa. *J Biol Chem.* 2001;276(43):39858-39863. pmid:  
455 11517233.  
456
- 457 **19.** Grassie ME, Moffat LD, Walsh MP, MacDonald JA. The myosin phosphatase targeting  
458 protein (MYPT) family: A regulated mechanism for achieving substrate specificity of the  
459 catalytic subunit of protein phosphatase type 1δ. *Arch Biochem Biophys.* 2011;510(2):147-  
460 159. pmid:21291858.  
461
- 462 **20.** Matsumura F, Hartshorne DJ. Myosin phosphatase target subunit: Many roles in cell  
463 function. *Biochem Biophys Res Comm.* 2008;369(1):149-156. pmid: 18155661  
464
- 465 **21.** Velasco G, Armstrong C, Morrice N, Frame S, Cohen P. Phosphorylation of the regulatory  
466 subunit of smooth muscle protein phosphatase 1δ at Thr850 induces its dissociation from  
467 myosin. *FEBS Lett.* 2002;527:101-104. pmid:12220642.  
468
- 469 **22.** Chen CP, Chen X, Qiao YN, Wang P, He WQ, Zhang CH, et al. In vivo roles for myosin  
470 phosphatase targeting subunit-1 phosphorylation sites T694 and T852 in bladder smooth  
471 muscle contraction. *J Physiol.* 2015;593(3):681-700. pmid: 25433069  
472
- 473 **23.** He W-Q, Qiao Y-N, Peng Y-J, Zha J-M, Zhang C-H, Chen C, et al. Altered contractile  
474 phenotypes of intestinal smooth muscle in mice deficient in myosin phosphatase target  
475 subunit 1. *Gastroenterol.* 2013;144(7):1456-1465. pmid: 23499953  
476
- 477
- 478 **24.** Gao N, Huang J, He W, Zhu M, Kamm KE, Stull JT. Signaling through myosin light chain

- 479 kinase in smooth muscles. *J Biol Chem*. 2013. 288(11):7596-605. pmid: 23362260
- 480 **25.** Kitazawa T, Gaylann BD, Denney GH, Somlyo AP. G-protein-mediated Ca<sup>2+</sup> sensitization of  
481 smooth muscle contraction through myosin light chain phosphorylation. *J Biol Chem*.  
482 1991;266(3):1708-1715. pmid: 1671041  
483
- 484 **26.** Mizuno Y, Isotani E, Huang J, Ding H, Stull JT, Kamm KE. Myosin light chain kinase  
485 activation and calcium sensitization in smooth muscle in vivo. *Am J Physiol - Cell*  
486 *Physiology*. 2008;295(2):C358-C364. pmid: 18524939  
487
- 488 **27.** Khalifeh-Soltani A, Ha A, Podolsky MJ, McCarthy DA, McKleroy W, Azary S, et al.  $\alpha 8\beta 1$   
489 integrin regulates nutrient absorption through an Mfge8-PTEN dependent mechanism.  
490 *Elife*. 2016;5. pmid: 27092791.  
491
- 492 **28.** Bhetwal BP, An CL, Fisher SA, Perrino BA. Regulation of basal LC20 phosphorylation by  
493 MYPT1 and CPI-17 in murine gastric antrum, gastric fundus, and proximal colon smooth  
494 muscles. *Neurogastroenterol Motil*. 2011;23(10):e425-e436. pmid: 21883701  
495
- 496 **29.** Bhetwal BP, An CL, Baker SA, Lyon KL, Perrino BA. Impaired contractile responses and  
497 altered expression and phosphorylation of Ca<sup>2+</sup> sensitization proteins in gastric antrum  
498 smooth muscles from ob/ob mice. *J Muscle Res Cell Motil*. 2013;34(2):137-149.  
499 pmid: 23576331  
500
- 501 **30.** Bhetwal BP, Sanders KM, An C, Trapanese DM, Moreland RS, Perrino BA. Ca<sup>2+</sup>  
502 sensitization pathways accessed by cholinergic neurotransmission in the murine gastric  
503 fundus. *J Physiol (Editors' Choice)*. 2013;591(Pt 12):2971-2986. pmid: 23613531  
504
- 505 **31.** Rhee PL, Lee JY, Son HJ, Kim JJ, Rhee JC, Kim S, et al. Analysis of pacemaker activity in  
506 the human stomach. *J Physiol*. 2011;589(Pt 24):6105-6118. pmid: 22005683.  
507
- 508 **32.** Li W, Sasse KC, Bayguinov Y, Ward SM, Perrino BA. Contractile protein expression and  
509 phosphorylation and contractility of gastric smooth muscles from obese patients and  
510 patients with obesity and diabetes. *J Diabetes Res*. 2018:8743874. pmid: 29955616.  
511
- 512 **33.** Xie Y, Han KH, Grainger N, Li W, Corrigan RD, Perrino BA. A role for focal adhesion  
513 kinase in facilitating the contractile responses of murine gastric fundus smooth muscles. *J*  
514 *Physiol*. 2018;596(11):2131-2146. pmid: 29528115.  
515
- 516 **34.** Xie Y, Perrino BA. Quantitative in situ proximity ligation assays examining protein  
517 interactions and phosphorylation during smooth muscle contractions. *Anal Biochem*.  
518 2019;577:1-13. pmid: 30981700.  
519
- 520 **35.** Ulke-Lemée A, Turner SR, MacDonald JA. In situ analysis of smoothelin-like 1 and  
521 calmodulin interactions in smooth muscle cells by proximity ligation. *J Cell Biochem*.  
522 2015;116(11):2667-2675. pmid: 25923522.  
523
- 524 **36.** Zheng Y, Leftheris K. Insights into protein-ligand interactions in integrin complexes:  
525 Advances in structure determinations. *J Med Chem*. 2020;63(11):5675-5696. pmid:  
526 31999923.  
527
- 528 **37.** Atabai K, Fernandez R, Huang X, Ueki I, Kline A, Li Y, et al. Mfge8 is critical for mammary

- 529 gland remodeling during involution. *Mol Biol Cell*. 2005;16(12):5528-5537. pmid:  
530 16195353.
- 531
- 532 **38.** Stubbs JD, Lekutis C, Singer KL, Bui A, Yuzuki D, Srinivasan U, et al. cDNA cloning of a  
533 mouse mammary epithelial cell surface protein reveals the existence of epidermal growth  
534 factor-like domains linked to factor VIII-like sequences. *Proc Natl Acad Sci USA*.  
535 1990;87(21):8417-8421. pmid: 2122462.
- 536
- 537 **39.** Raymond A, Ensslin MA, Shur BD. SED1/MFG-E8: a bi-motif protein that orchestrates  
538 diverse cellular interactions. *J Cell Biochem*. 2009;106(6):957-966. pmid:  
539 19204935.
- 540
- 541 **40.** Humbert C, Silbermann F, Morar B, Parisot M, Zarhrate M, Masson C, et al. Integrin alpha  
542 8 recessive mutations are responsible for bilateral renal agenesis in humans. *Am J Hum*  
543 *Genet*. 2014;94(2):288-294. pmid: 24439109.
- 544
- 545 **41.** Müller U, Wang D, Denda S, Meneses JJ, Pedersen RA, Reichardt LF. Integrin  
546 alpha8beta1 is critically important for epithelial-mesenchymal interactions during kidney  
547 morphogenesis. *Cell*. 1997;88(5):603-613. pmid: 9054500.
- 548
- 549 **42.** Schnapp LM, Hatch N, Ramos DM, Klimanskaya IV, Sheppard D, Pytela R. The human  
550 integrin alpha 8 beta 1 functions as a receptor for tenascin, fibronectin, and vitronectin. *J*  
551 *Biol Chem*. 1995;270(39):23196-23202. pmid: 7559467.
- 552
- 553 **43.** Zargham R, Thibault G. Alpha 8 integrin expression is required for maintenance of the  
554 smooth muscle cell differentiated phenotype. *Cardiovasc Res*. 2006;71(1):170-178. pmid:  
555 16603140.
- 556
- 557 **44.** Zargham R, Touyz RM, Thibault G. alpha 8 Integrin overexpression in de-differentiated  
558 vascular smooth muscle cells attenuates migratory activity and restores the characteristics  
559 of the differentiated phenotype. *Atherosclerosis*. 2007;195(2):303-312. pmid: 17275006.
- 560
- 561 **45.** Zhang MJ, Zhou Y, Chen L, Wang YQ, Wang X, Pi Y, et al. An overview of potential  
562 molecular mechanisms involved in VSMC phenotypic modulation. *Histochem Cell Biol*.  
563 2016;145(2):119-130. pmid: 26708152.
- 564
- 565 **46.** Khalifeh-Soltani A, Gupta D, Ha A, Podolsky MJ, Datta R, Atabai K. The Mfge8- $\alpha$ 8 $\beta$ 1-  
566 PTEN pathway regulates airway smooth muscle contraction in allergic inflammation. *Faseb*  
567 *J*. 2018:fj201800109R. pmid: 29763381.
- 568
- 569 **47.** Kudo M, Khalifeh Soltani SM, Sakuma SA, McKleroy W, Lee TH, Woodruff PG, et al.  
570 Mfge8 suppresses airway hyperresponsiveness in asthma by regulating smooth muscle  
571 contraction. *Proc Natl Acad Sci USA*. 2013;110(2):660-665. pmid: 23269839.
- 572
- 573 **48.** Perrino BA. Calcium Sensitization Mechanisms in Gastrointestinal Smooth Muscles. *J*  
574 *Neurogastroenterol Motil*. 2016. 22(2):213-25. pmid: 26701920
- 575
- 576 **49.** Mehta D, Gunst SJ. Actin polymerization stimulated by contractile activation regulates f  
577 force development in canine tracheal smooth muscle. *J Physiol*. 1999;519 Pt 3(Pt 3):829-  
578 840. pmid: 10457094.
- 579

- 580 **50.** Zhang W, Bhetwal BP, Gunst SJ. Rho kinase collaborates with p21-activated kinase to  
581 regulate actin polymerization and contraction in airway smooth muscle. *J Physiol.*  
582 2018;596(16):3617-35. pmid: 29746010.  
583
- 584 **51.** Mills RD, Mita M, Nakagawa J, Shoji M, Sutherland C, Walsh MP. A role for the tyrosine  
585 kinase Pyk2 in depolarization-induced contraction of vascular smooth muscle. *J Biol Chem.*  
586 2015;290(14):8677-8692. pmid: 25713079.  
587
- 588 **52.** Zheng C, Xing Z, Bian ZC, Guo C, Akbay A, Warner L, et al. Differential regulation of Pyk2  
589 and focal adhesion kinase (FAK). The C-terminal domain of FAK confers response to cell  
590 adhesion. *J Biol Chem.* 1998;273(4):2384-389. pmid: 9442086.  
591
- 592 **53.** Gerthoffer WT, Gunst SJ. Invited Review: Focal adhesion and small heat shock proteins in  
593 the regulation of actin remodeling and contractility in smooth muscle. *J Appl Physiol.*  
594 2001;91(2):963-972. pmid: 11457815.  
595

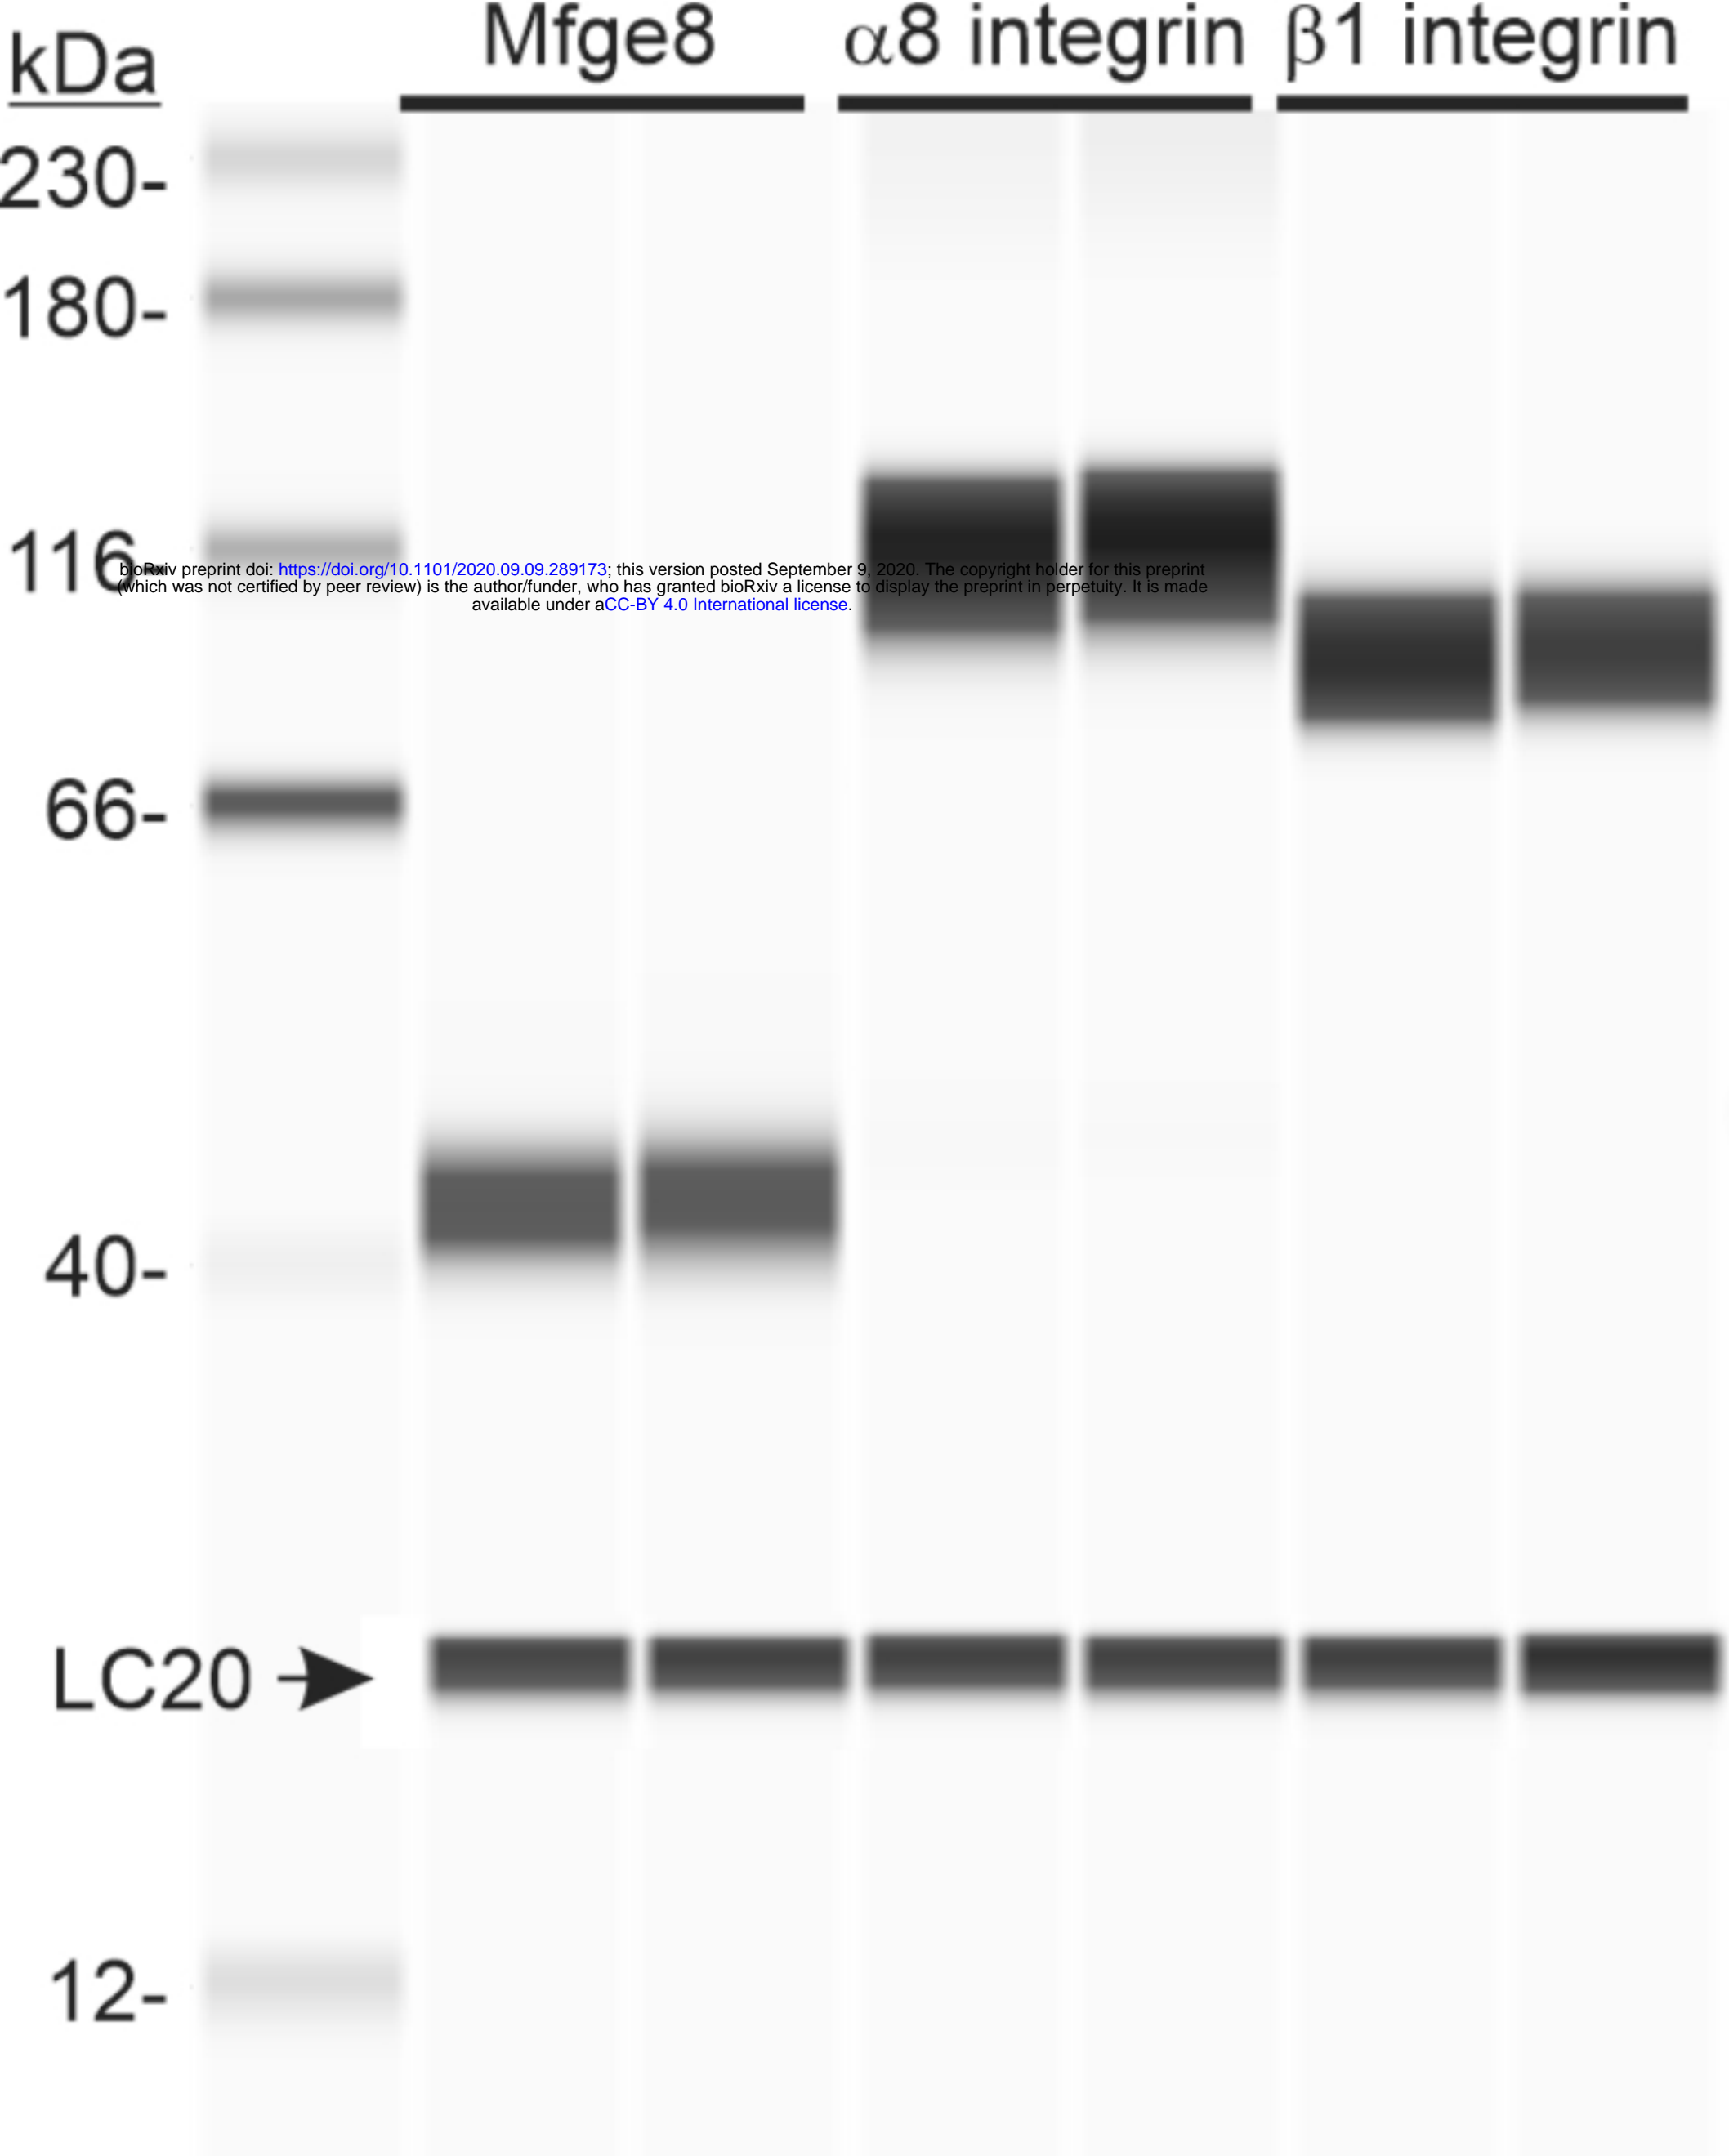

Figure

$\alpha 8$  integrin- $\beta 1$  integrin PLA

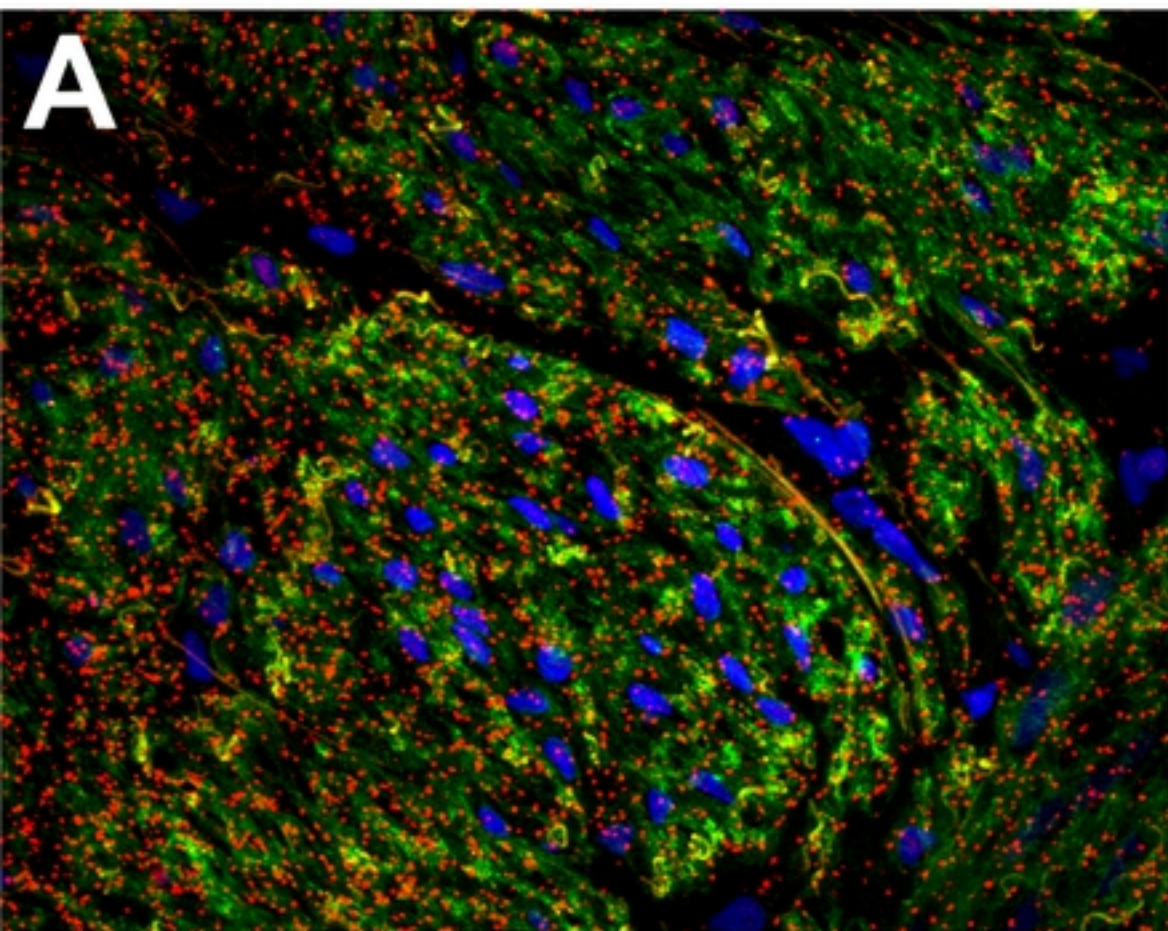

$\alpha 8$  integrin-Mfge8 PLA

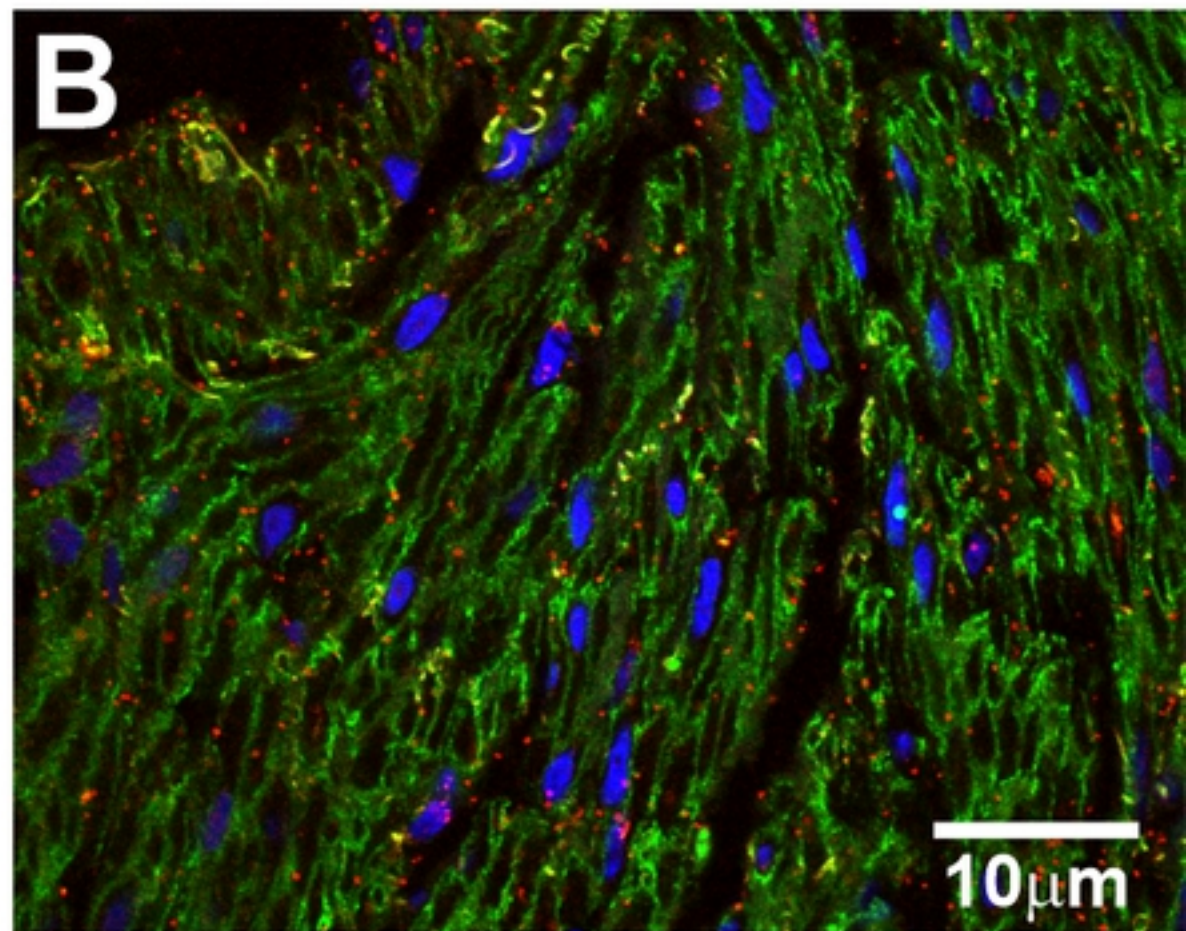

Figure

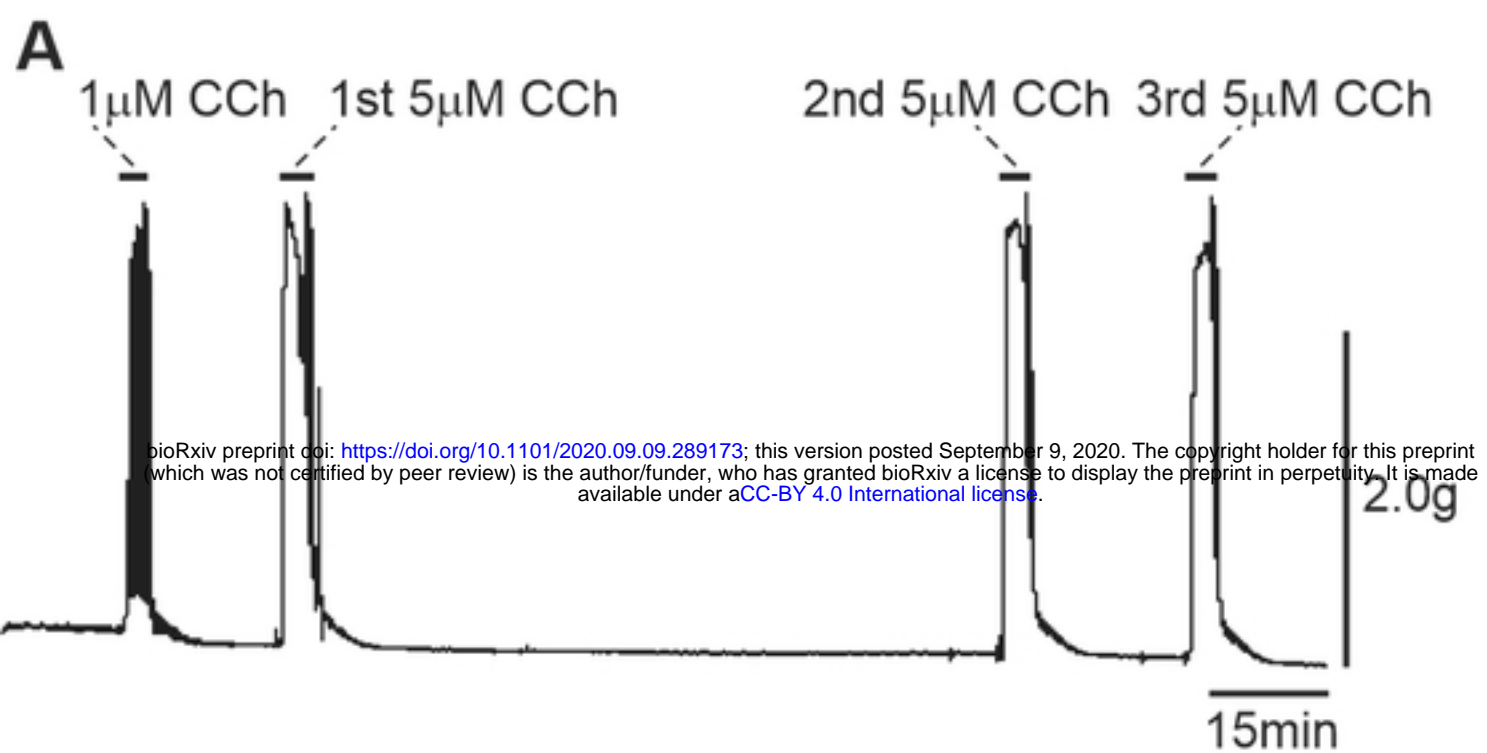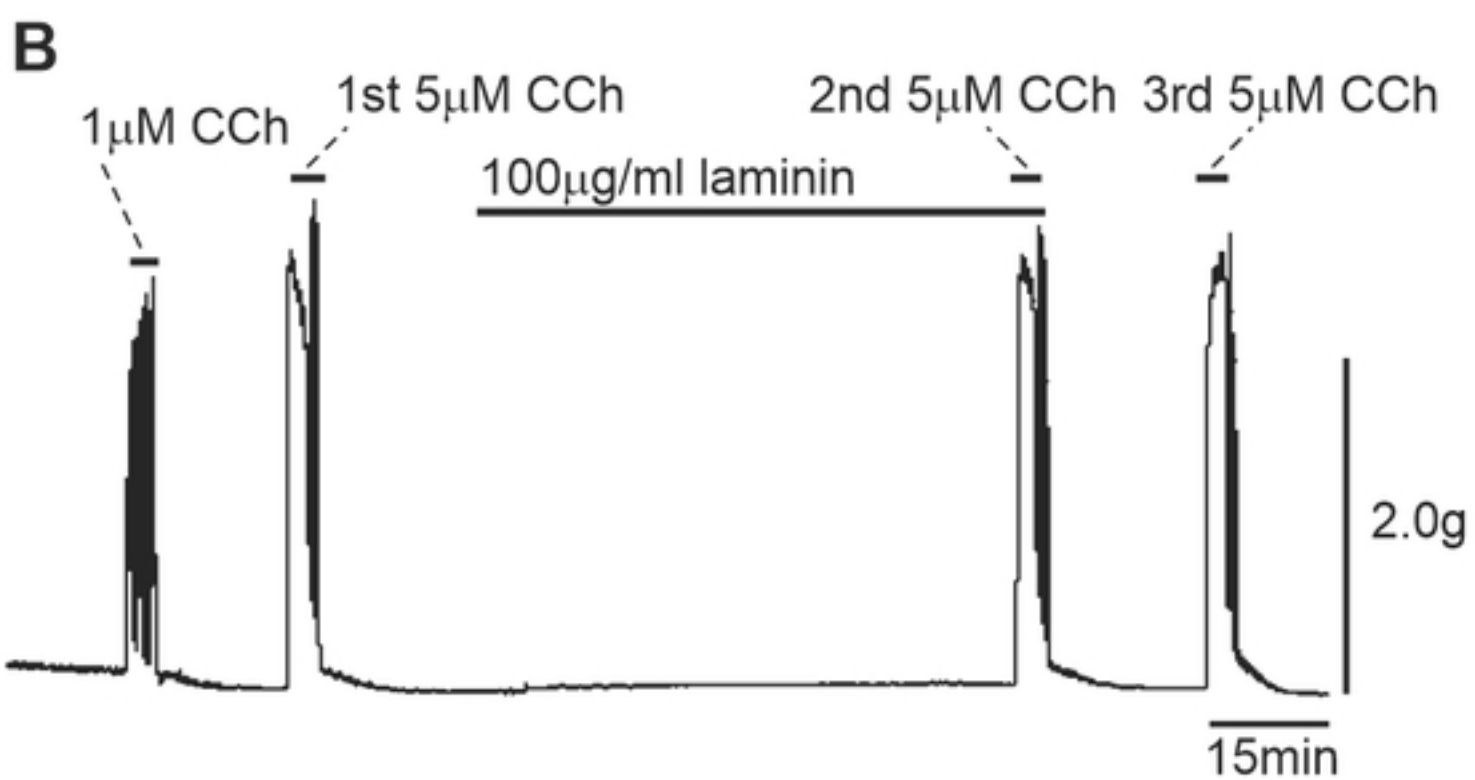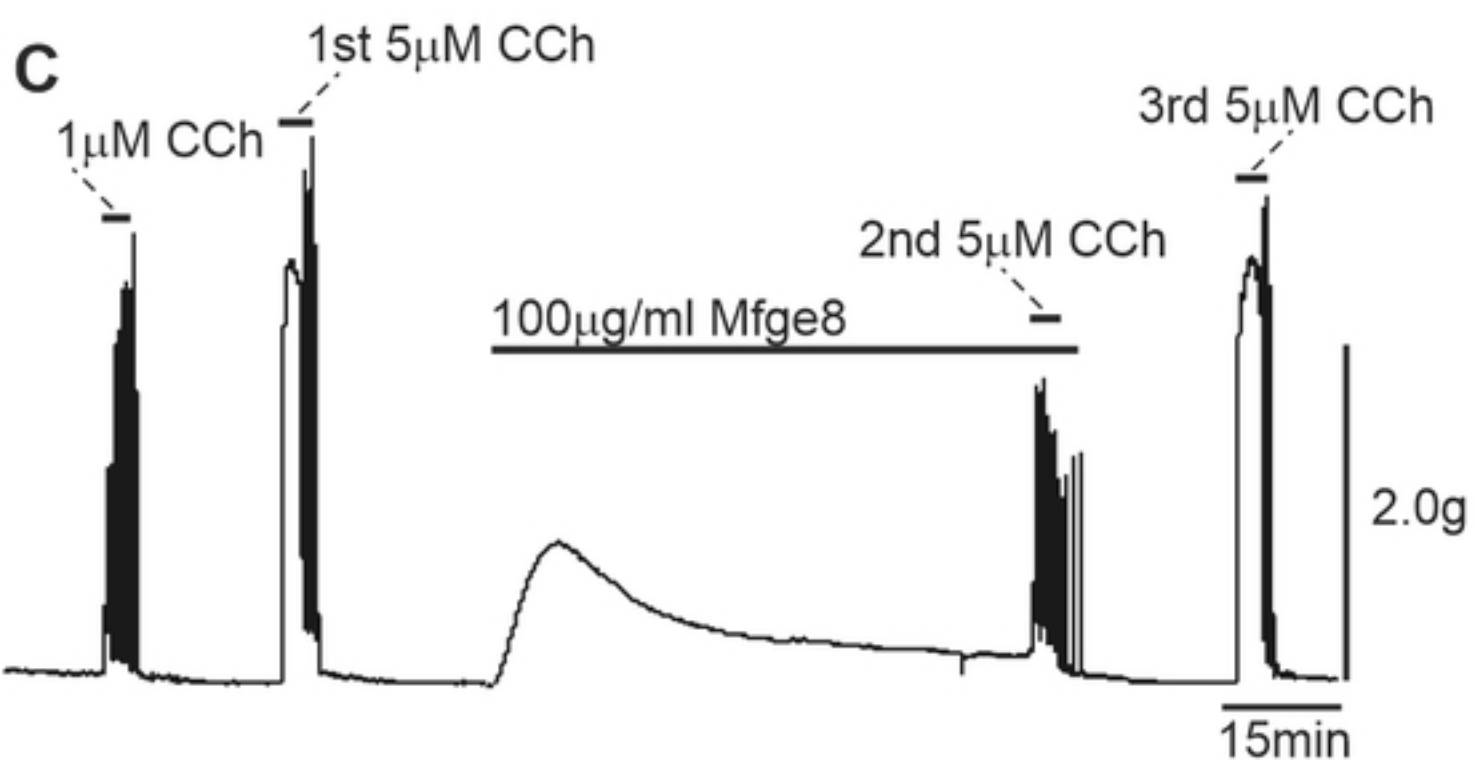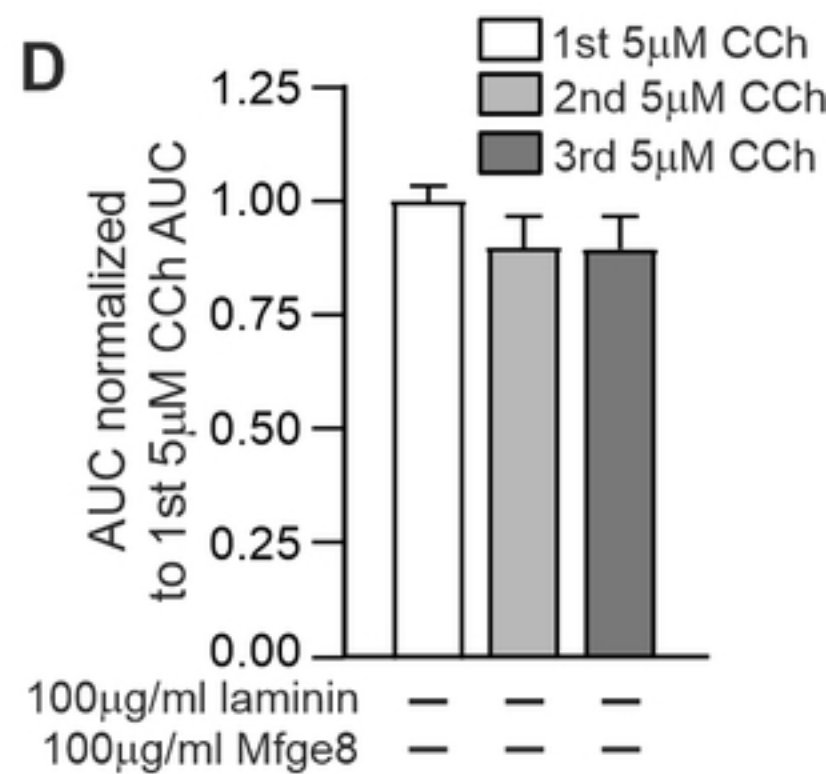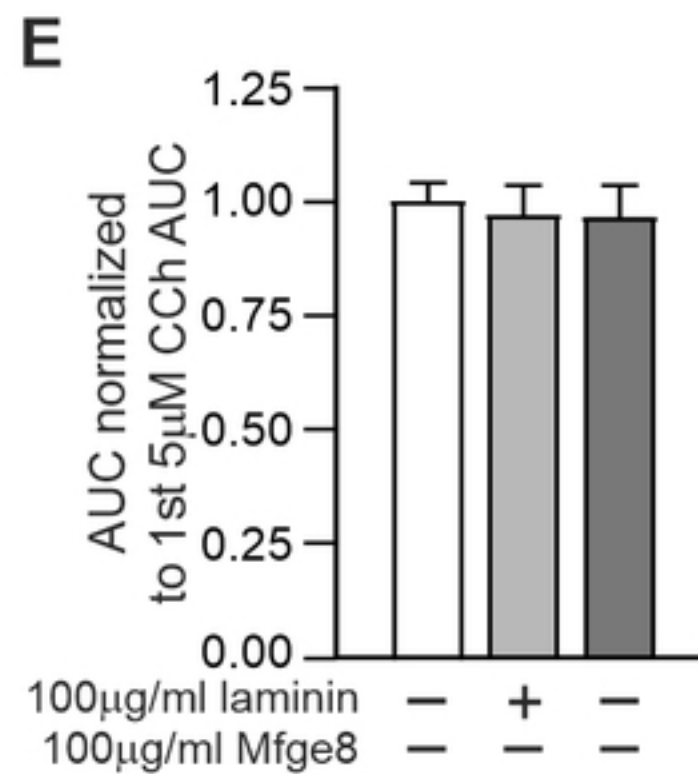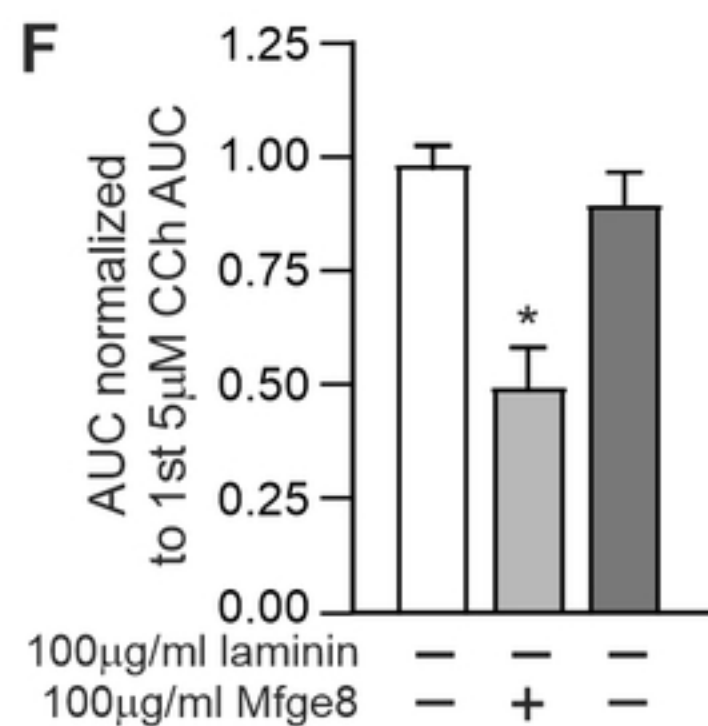

Figure



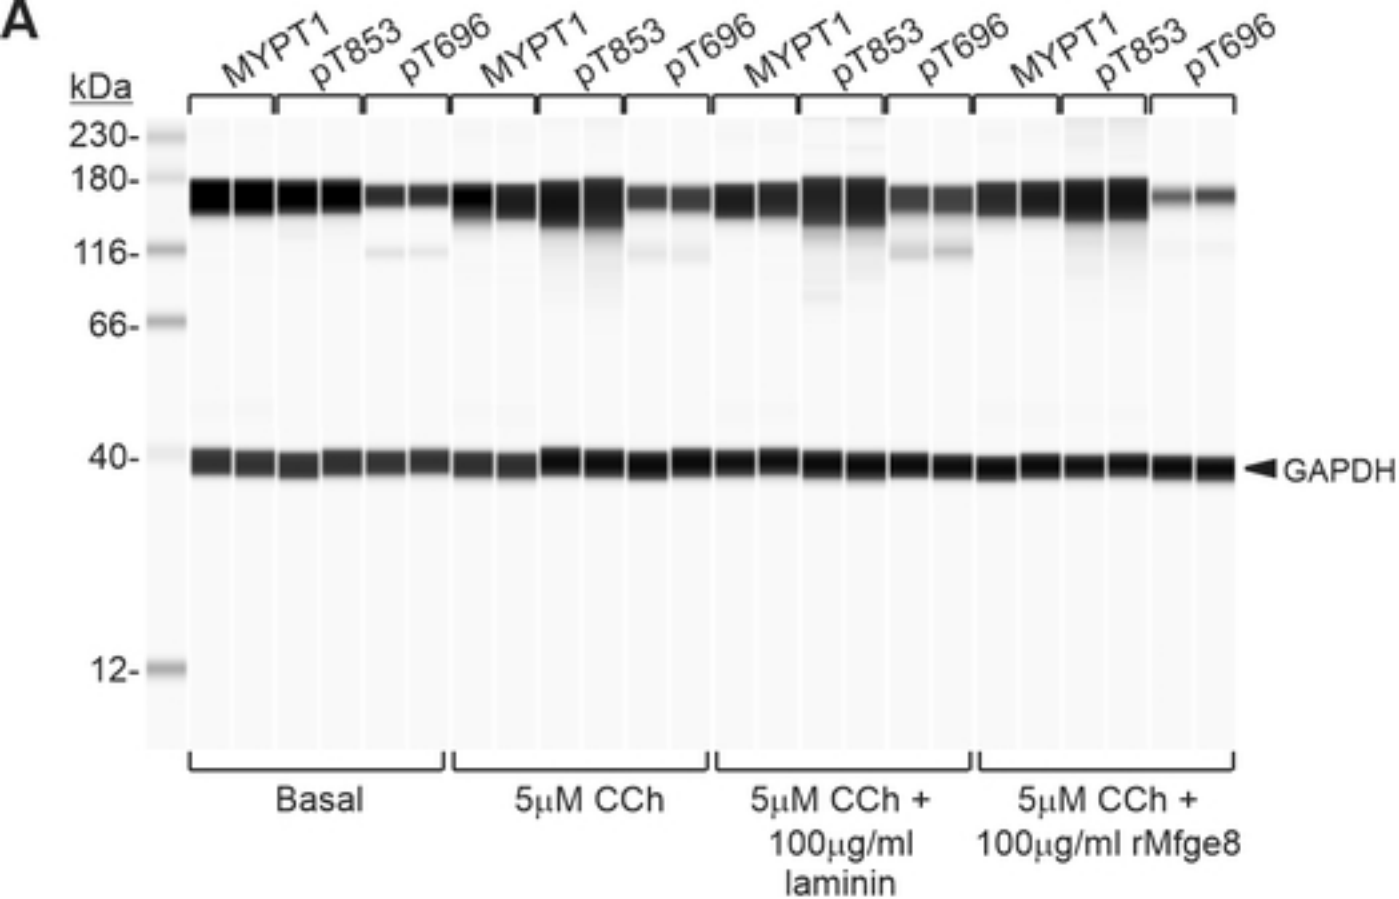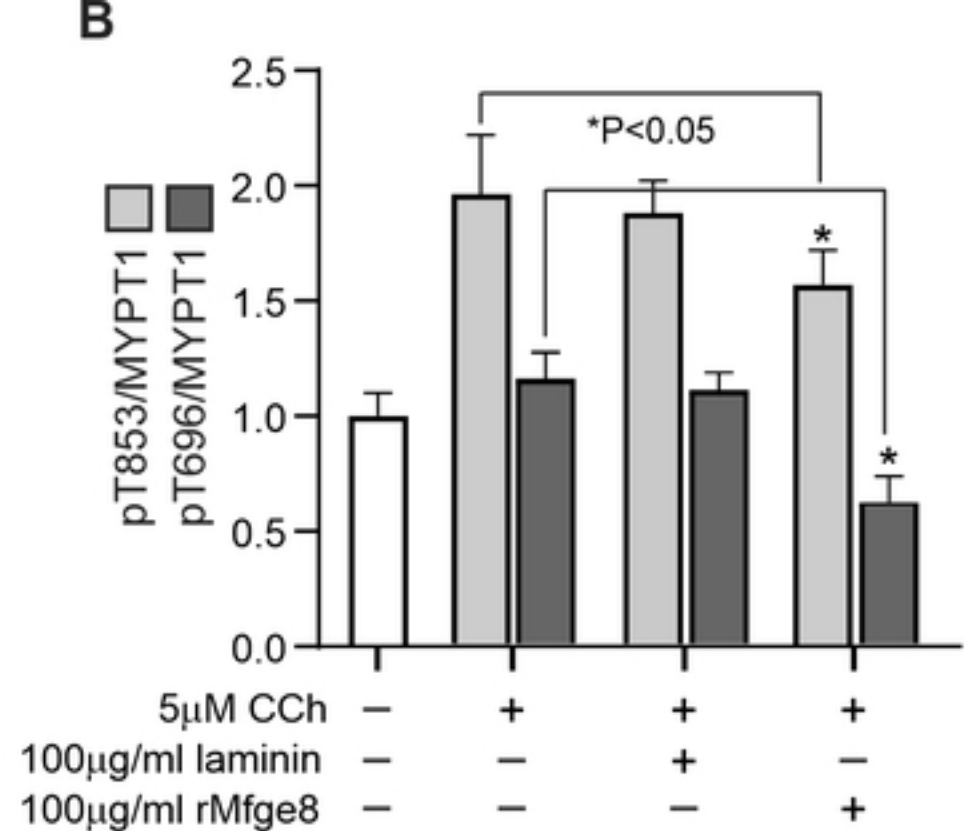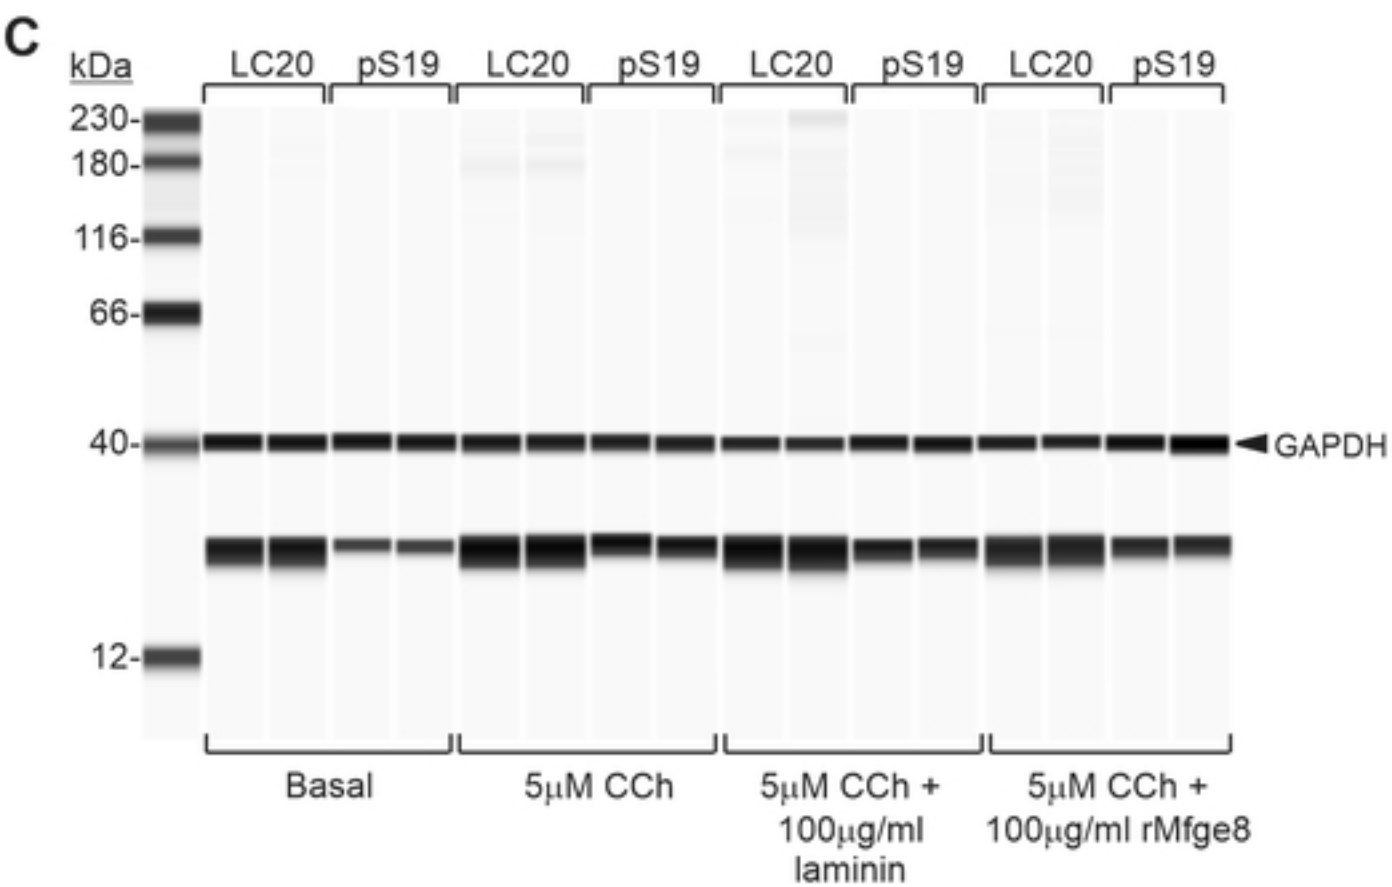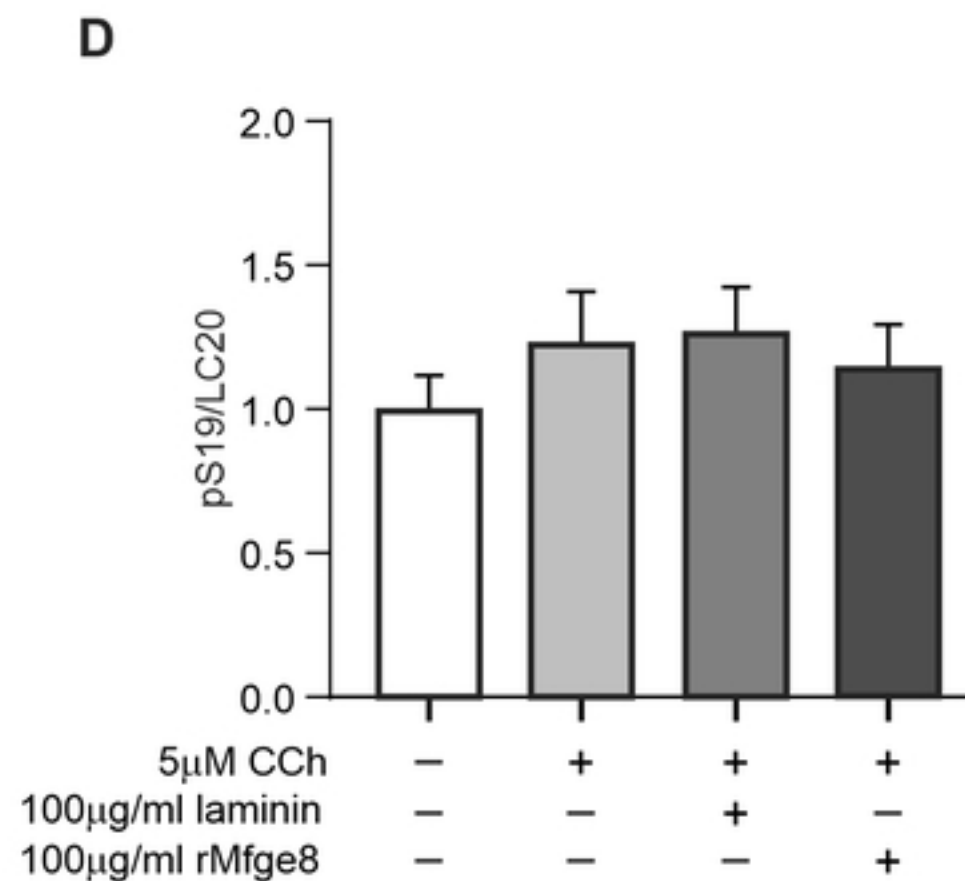

Figure

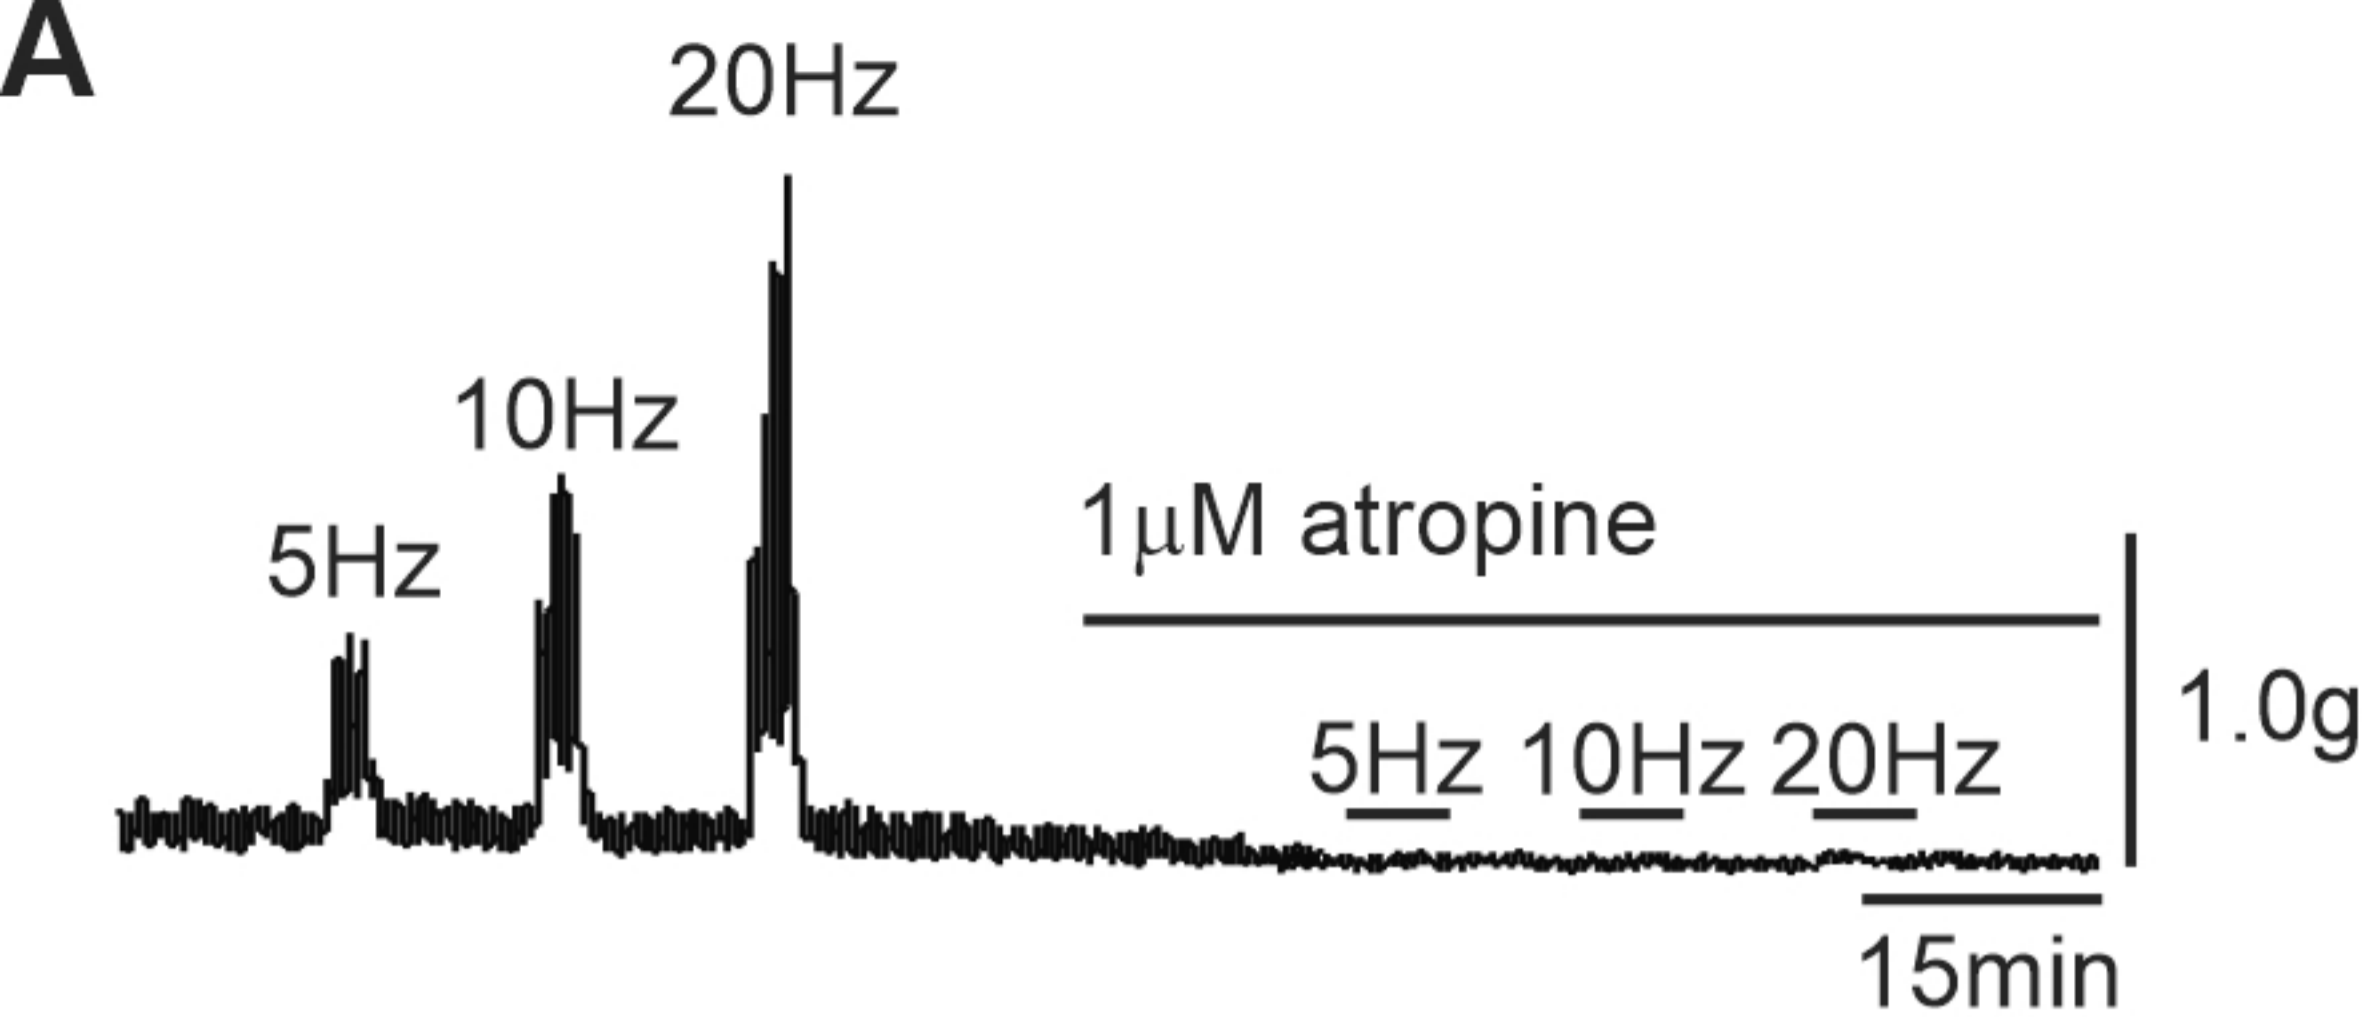

bioRxiv preprint doi: <https://doi.org/10.1101/2020.09.09.289173>; this version posted September 9, 2020. The copyright holder for this preprint (which was not certified by peer review) is the author/funder, who has granted bioRxiv a license to display the preprint in perpetuity. It is made available under aCC-BY 4.0 International license.

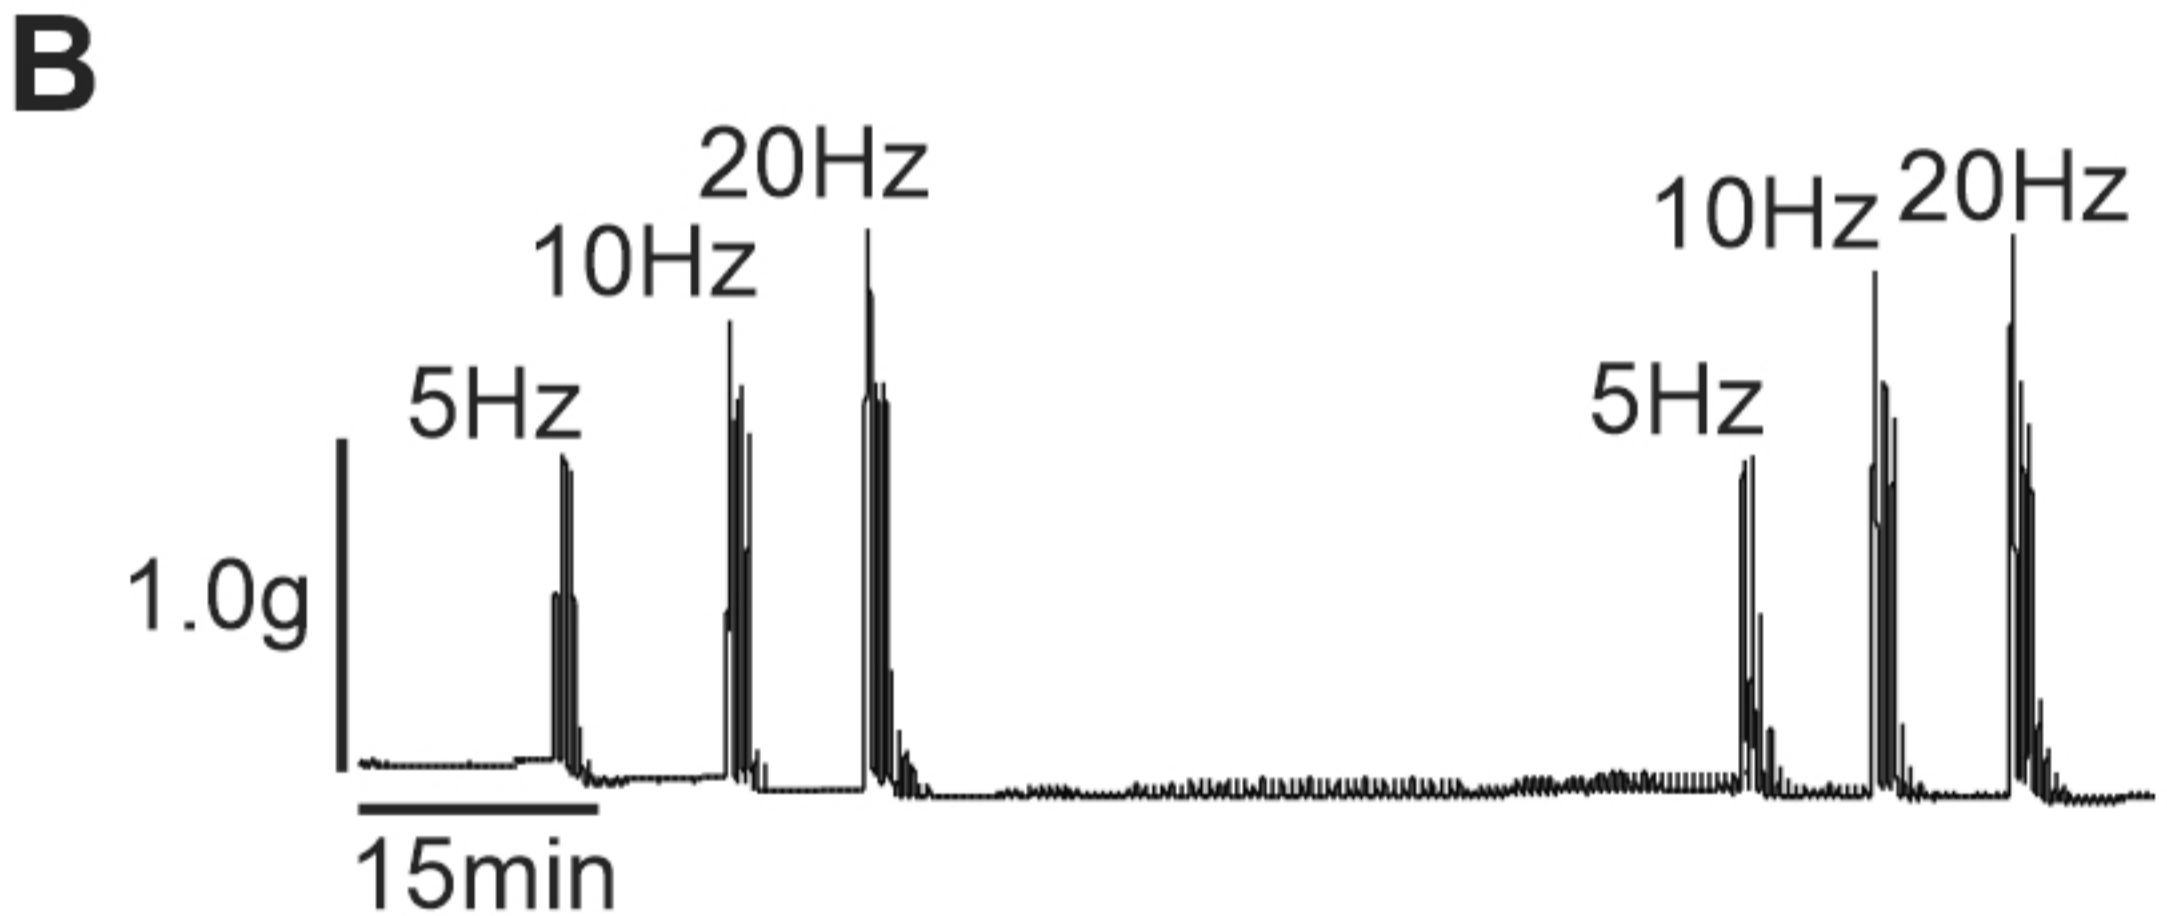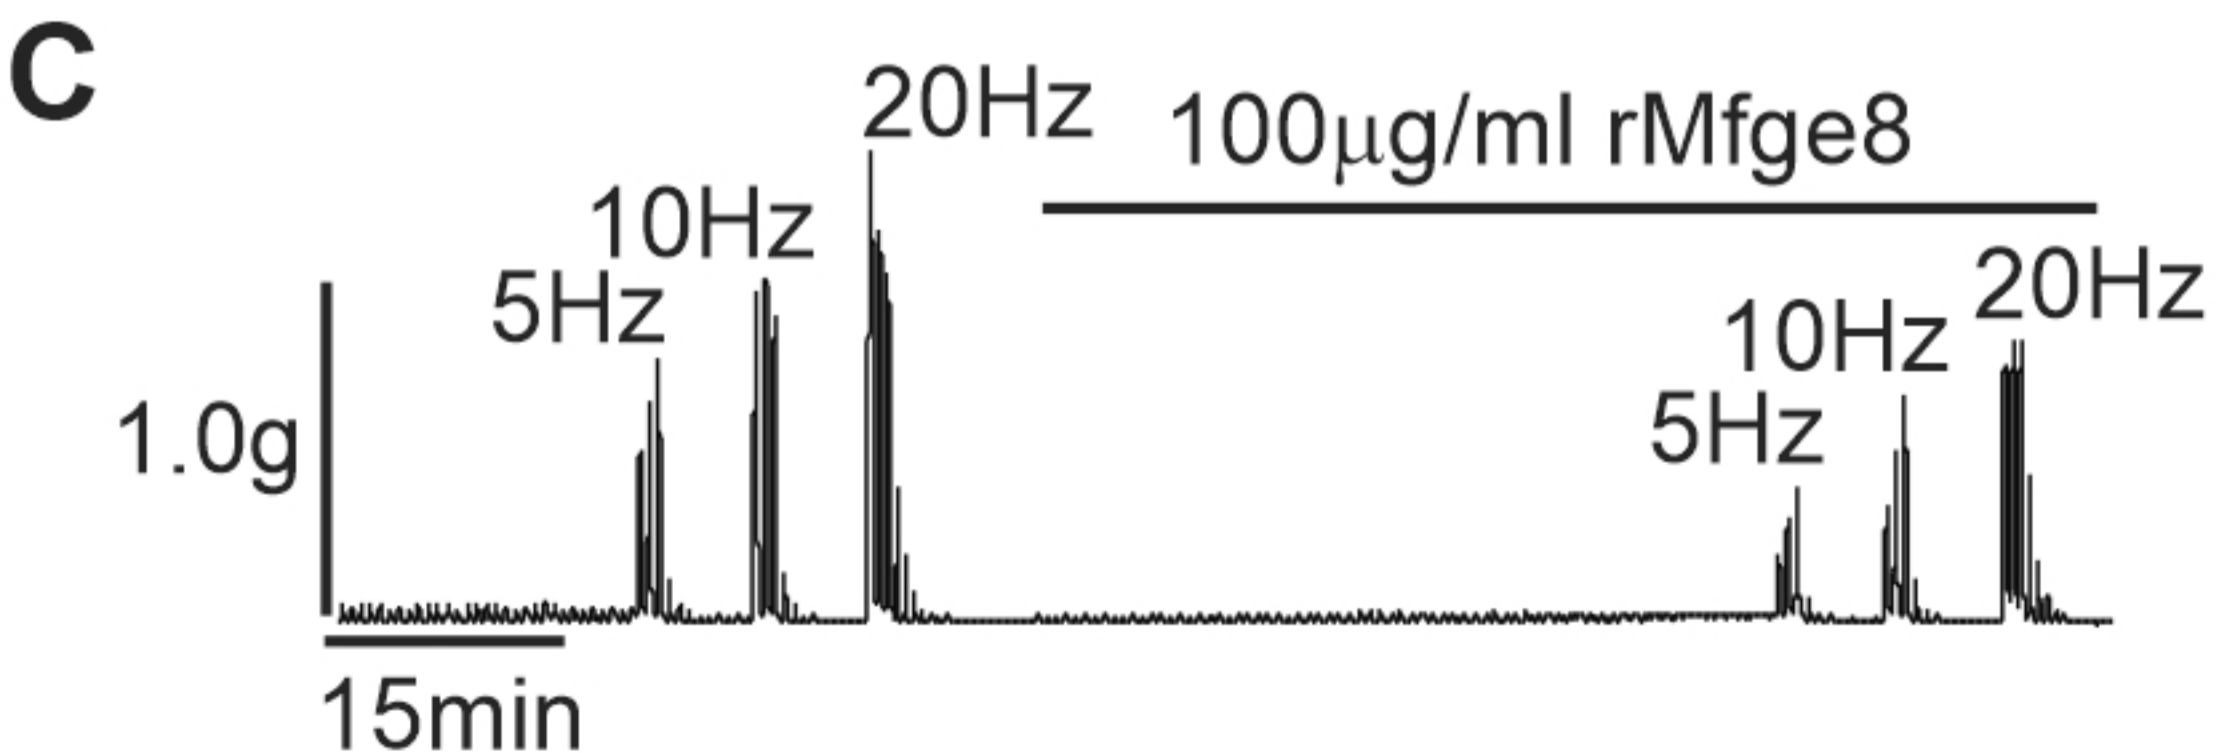

Figure
